# Supplementary material
Source: ML conference proceedings conference paper supplement (https://openreview.net/forum?id=N9RyL52z7y)
Supplement: supplementary_material [file 1. cd3cd28.xls]

## Sheet: Sheet1
praf	pmek	plcg	PIP2	PIP3	p44/42	pakts473	PKA	PKC	P38	pjnk
26.4	13.2	8.82	18.3	58.8	6.61	17	414	17	44.9	40
35.9	16.5	12.3	16.8	8.13	18.6	32.5	352	3.37	16.5	61.5
59.4	44.1	14.6	10.2	13	14.9	32.5	403	11.4	31.9	19.5
73	82.8	23.1	13.5	1.29	5.83	11.8	528	13.7	28.6	23.1
33.7	19.8	5.19	9.73	24.8	21.1	46.1	305	4.66	25.7	81.3
18.8	3.75	17.6	22.1	10.9	11.9	25.7	610	13.7	49.1	57.8
44.9	36.5	10.4	132	16.3	8.66	17.9	835	15	35.9	18.1
47.4	15	14.6	30.5	17.5	20.2	45.3	466	6.44	24.4	20
104	61.5	10.6	21.1	41.8	11.5	23.5	445	29.2	61	25.3
21.1	21.5	1.88	205	43.7	13.2	135	213	14.6	26.7	101
16.4	16.4	14.5	17	11.2	21.9	34.6	449	20.4	44.9	24.1
74.3	22.9	7.5	15.5	26.2	20.9	36.5	389	31.9	71	35.5
85.1	39.6	8.9	64.9	11.7	6.67	12.2	528	17.9	44.1	118
36.8	29.2	5	9.06	15.5	17.9	17.9	400	14.6	41.4	151
29.2	24.1	10.2	16	46.6	8.82	7.23	500	9.73	19.1	7.91
50	13.8	11.9	13.2	11.3	18.1	27.9	392	56.2	77	1
26.2	26.7	21.3	10.9	14.7	9.06	37.9	89	40	65.5	1.42
39.6	38.2	10.5	92.2	22.7	27.6	31.3	223	16.5	30.8	7.64
30.5	19.8	7.5	133	15.7	19.1	36.2	319	24.1	37.2	17.2
49.1	16.5	13.3	141	25.7	31.1	62.1	710	14.2	27.4	22.1
38.5	8.9	11.3	85.8	17.9	12.1	35.9	843	12	28.4	20.9
31.6	17.8	14.5	10.6	4.91	10.2	23.9	276	13.8	28.4	12.7
41	27.9	1	137	23.9	30.2	50	965	1	84.3	4.61
70.4	54.2	15.4	24.4	12.9	9.91	27.9	449	35.9	93.9	48.3
70.4	42.2	17.6	20.9	10.5	59.4	98.2	1981	35.9	46.1	17.8
21.5	1	8.28	181	43.7	18.8	38.5	644	13.6	29.2	7.04
39.2	23.1	18.6	22.1	10.6	17.8	32.2	466	10.5	23.3	6.98
69.8	20.4	19.8	18.4	6.26	10.4	25	500	22.7	48.3	59.4
34.9	22.3	17.2	50	23.1	34.3	51.4	308	13.2	38.9	196
40.7	24.8	13	62.6	38.2	5.14	14.7	673	28.1	41.8	23.1
45.7	15.7	13.2	21.3	7.5	23.9	49.1	1382	19.5	38.5	20.9
43.7	29.2	14.5	17.6	13.1	8.58	12.5	621	34	67.9	28.1
79.9	80.6	4.41	209	19.5	10.5	35.5	422	26.9	40.3	15.3
56.7	17.3	21.7	18.1	12.7	9.22	22.9	552	38.5	59.9	17.9
58.8	19.5	2.57	41.4	2.21	19.1	33.7	325	22.9	31.9	20.7
53.8	12.7	10.9	12.4	30.8	20.2	37.9	403	22.5	38.5	20.9
58.3	23.1	18.9	79.1	24.4	36.2	48.7	429	14.7	28.9	12.6
160	28.1	7.1	115	16.1	4.96	12.4	1241	2.46	31.3	83.5
45.3	9.39	12.2	53.8	27.6	4.29	27.6	599	38.2	80.6	139
54.7	28.4	8.35	9.39	20.7	38.5	59.9	898	12.7	23.7	13.5
85.1	26.9	25.3	47.8	22.9	13.6	14.2	396	4.74	8.98	43.3
109	43.7	9.47	343	60.4	27.1	42.6	319	14.9	37.9	17.8
25.7	15.3	1	120	23.7	2.69	18.9	10.2	4.96	40.3	221
50.5	28.1	27.6	28.9	13.8	14.7	24.8	382	15.3	20	7.7
69.2	17.8	17.8	62.1	23.1	2.71	13.3	562	4.45	20	105
62.6	19.3	8.51	20.9	39.2	4.49	24.8	474	23.5	48.7	22.5
67.9	43.7	11.4	19.3	15.8	17.8	38.5	1433	31.9	66.7	40
75	57.8	4.91	15.4	24.6	21.9	36.2	233	21.3	46.1	17
50.9	42.2	7.57	122	48.3	6.26	36.2	1027	12.5	32.8	108
79.9	20.4	24.1	22.5	20	8.82	24.1	466	19.1	34.9	6.15
62.6	21.7	21.9	22.1	3.82	39.2	75.7	1310	8.74	22.7	11.7
50.9	25.3	6.38	76.4	17.2	9.06	15.4	673	4.66	26.9	173
75	30.5	13.6	51.4	42.2	25.3	35.5	466	20.4	43.7	10.1
59.4	25.3	11.7	20.7	27.9	3.62	12.4	29.7	17.2	32.5	10.5
181	37.9	1	292	49.6	6.38	13.1	573	20.9	38.2	17.6
69.8	33.1	12.7	67.3	1.91	4.07	27.1	973	85.8	121	32.5
57.3	19.1	11.1	42.2	6.61	5.83	13.5	547	44.9	80.6	71.7
82.8	30.5	13.9	18.6	6.92	23.5	37.5	418	6.55	16.7	95.6
35.5	24.6	15.7	35.5	11.9	21.9	45.7	322	6.79	23.3	11.9
80.6	27.9	17.9	42.6	17.3	2.84	20.7	188	20.7	33.1	17.5
113	45.7	10.8	154	58.3	13.1	21.5	337	5.47	20	9.39
8.9	10.1	10.3	89	29.4	181	355	1731	24.1	42.2	20.7
35.2	14.1	7.1	20.2	32.2	12.9	22.5	583	37.5	47.4	9.47
24.1	12.3	12.7	62.6	26.7	9.14	16.5	547	25.7	59.9	80.6
164	33.1	5.78	28.6	13.7	16.3	24.1	319	22.5	35.5	12.4
57.8	27.1	15.5	57.3	19.5	25.9	34.6	382	3.05	27.1	78.4
90.6	27.4	40	97.3	71	10.9	18.9	429	4.45	42.9	80.6
38.5	12.7	4.37	22.7	23.7	4.22	10.8	578	1.86	7.37	3.43
51.4	36.8	12.7	40.3	21.7	12.7	25.9	667	2.5	14.9	64.9
26.9	15.1	18.6	20.5	8.43	20.4	38.5	437	11.7	24.4	15.4
56.2	21.1	12.7	21.1	57.8	14.1	19.8	474	25.9	39.6	75.7
70.4	35.5	18.4	45.7	47.8	18.8	31.6	418	10	22.3	6.67
58.8	35.2	12.2	16.5	24.1	18.4	33.7	362	16.3	19.8	10.4
69.2	35.5	17.3	50	19.8	8.51	18.6	151	12	31.1	27.6
69.8	47	25.5	276	77	32.8	51.4	799	19.6	47.8	16.4
105	59.9	20	19.6	15.1	6.85	23.1	1065	1.67	48.3	4.66
62.1	51.9	13.6	30.2	10.6	14.3	37.9	692	6.49	25	91.4
75	33.4	1	31.6	1	19.8	27.6	505	18.6	31.1	7.64
20.4	15.1	7.99	101	35.9	9.14	22.9	400	11.7	22.7	6.85
47.8	19.6	17.5	33.1	82	17.9	35.2	956	22.5	43.3	20
59.9	53.3	11.8	77.7	12.9	11.1	37.9	1407	18.8	29.4	16.8
46.6	27.1	12.4	109	21.9	21.5	38.2	207	11	31.3	12
51.9	21.3	49.1	58.8	10.8	58.8	200	3051	15.3	39.2	15.7
31.9	23.9	15.1	12.7	4.61	6.73	15	562	1	68.5	8.2
93.9	27.4	67.3	138	30.8	28.1	46.1	906	2.69	6.98	71
64.9	23.3	15.3	12.6	9.06	19.6	35.2	806	2.37	20	7.91
153	123	12	34.6	63.8	8.58	26.2	470	1	12	9.91
16.7	12.4	7.04	235	34.9	44.9	64.9	1843	23.5	36.2	30.5
71.7	25.5	13.1	12	43.3	12.2	31.3	655	7.7	16.4	49.1
35.5	23.7	2.89	4.26	12.9	13	22.7	470	7.77	33.4	16.3
83.5	61.5	13	34.6	12.3	3.46	19.5	239	2.53	2.69	6.1
31.9	8.82	12.9	154	56.7	16.8	16	433	9.56	48.7	54.2
29.4	20.2	7.7	125	27.4	89	150	799	2.71	15.4	49.1
302	325	17.6	25.7	10.7	29.2	38.2	313	10.8	36.5	17.2
40.3	16.5	11.5	505	67.3	19.3	29.7	483	2.92	15.3	89
29.2	15.4	9.73	23.1	71	6.38	47	557	20	24.6	7.7
46.1	25.7	12.7	24.4	37.2	16.8	35.9	375	5.47	39.2	95.6
52.3	21.5	27.1	155	67.9	7.23	23.9	820	3.59	25	93.1
48.7	36.5	18.6	10.6	13.9	6.1	25.9	1009	10.2	22.7	15.3
85.8	82	120	325	79.1	6.61	10.9	723	12.1	21.9	5.42
75.7	25.9	21.5	64.4	45.3	8.28	28.4	583	15.7	36.8	13.7
58.3	21.9	14.9	18.4	30.2	5.47	17.2	982	16.3	21.5	15.5
58.8	34.9	13.3	82.8	38.2	22.5	27.9	379	6.55	18.4	48.7
112	27.6	28.4	67.9	30.5	10.8	16.7	403	17.8	29.7	7.77
66.7	29.2	2.39	10.9	32.2	22.9	32.2	379	14.3	30.8	17.6
39.6	23.9	6.61	137	20.4	22.7	38.2	313	16.1	20	10.5
36.5	15.5	2.55	8.35	40	15.8	34.6	281	21.3	28.6	13.9
38.2	25.7	32.2	59.4	138	24.1	36.5	331	38.5	67.9	16.3
41.8	21.3	9.39	7.91	32.5	13.3	61	858	2.81	17.3	64.4
62.1	18.1	24.8	113	25.5	17	34.6	604	4.26	13.5	72.3
167	79.1	9.65	111	20.2	28.4	89	1472	20.4	29.2	12.9
55.7	28.6	25.9	51.9	64.9	7.5	17.6	271	2.21	4.45	9.73
84.3	71.7	12.9	93.1	36.5	8.9	17.8	906	9.06	25	42.2
60.4	25.3	19.1	27.4	44.5	44.5	64.9	1197	20.9	49.6	17.5
57.3	21.9	38.2	38.5	81.3	5.83	12.9	274	16	21.5	14.9
76.4	32.8	30	60.4	49.6	5.47	14.3	87.4	11.1	27.4	7.43
96.5	119	15.5	71	13.9	19.5	32.2	500	50.9	75	26.9
38.5	17.8	32.2	115	61	10.6	21.3	965	5	20.4	34.9
66.1	46.6	7.7	19.6	75.7	15.7	17.8	519	12	13.8	14.9
112	79.1	7.37	15	35.9	10.6	32.2	382	14.9	31.1	12
47	22.3	12.2	73	24.1	3.49	11.4	340	5.62	13.9	93.9
87.4	54.7	19.6	8.58	24.8	15.8	33.1	757	24.6	40.7	25
57.8	19.1	22.9	19.1	11.3	18.8	57.3	743	8.66	8.35	24.4
92.2	31.1	18.9	22.3	34.3	13.6	29.4	385	7.23	17.6	7.99
93.1	28.9	9.56	11.4	23.1	20.4	24.8	319	4.14	20.2	122
107	36.8	16	38.9	29.2	18.8	28.1	276	1.83	25.5	97.3
80.6	56.7	16.1	27.6	4.03	5.28	5.88	491	3.52	5.57	24.4
44.9	25.3	1	158	12.3	14.2	26.2	514	6.55	16.1	33.7
27.4	18.8	9.65	13.2	9.73	18.6	54.7	286	1.88	19.8	88.2
31.6	25.7	24.6	35.2	25.7	14.1	25.7	284	20.4	28.4	48.3
52.3	33.4	8.13	25.5	5.73	30.5	42.9	305	34.9	68.5	20.4
71.7	27.4	8.82	18.3	23.1	14.1	27.4	649	3.82	20.2	53.8
44.5	26.9	15.5	87.4	12.5	4.53	16	379	3.68	32.5	77
74.3	27.4	16.4	22.7	2	6.26	15.1	457	13.6	24.6	6.55
44.1	20.2	13.9	17.8	39.2	22.3	30.2	487	30.5	40	23.7
42.9	22.9	17.3	17.8	21.9	13.1	36.8	710	12.6	24.4	65.5
79.1	26.4	1.19	3.96	41.4	8.06	20.4	509	3.68	16	63.2
89	30	44.9	47	7.37	52.8	97.3	2288	69.8	94.7	8.28
63.2	27.4	14.5	80.6	41	15.1	38.2	453	13.6	32.8	13.1
27.9	20.7	25.3	70.4	42.2	6.98	21.3	313	24.8	44.5	23.1
69.8	22.9	19.3	17.5	9.73	20.7	28.1	255	13	25.3	9.73
28.9	15.7	22.7	37.9	49.1	13	23.5	509	22.1	53.8	35.9
102	30.8	7.17	82	49.1	20.2	25	343	3.96	26.9	87.4
59.4	25.3	14.9	61.5	26.2	22.5	36.5	239	2.74	14.5	77.7
89.8	31.3	18.8	22.5	8.74	25	37.5	426	29.7	60.4	24.1
200	33.1	19.5	56.2	16.1	21.7	35.5	305	4.26	14.2	95.6
62.1	18.1	14.9	149	62.1	4.49	20.7	698	44.1	125	57.3
46.1	23.7	17.9	276	41.4	15	19.5	334	16.7	31.6	11.8
149	85.1	8.43	7.99	17.8	29.2	69.2	1208	26.4	46.6	30
8.9	15.5	7.91	153	16	40.3	61.5	1582	12.2	25.7	12
109	40	9.82	24.4	73	12.3	23.1	487	17.9	30.8	15.1
71.7	42.9	31.1	23.9	10.5	8.13	34.9	2571	1	33.4	1.01
68.5	24.4	16.3	47.8	13.9	5.94	17.2	649	18.6	38.5	17.8
79.9	44.1	4.45	89.8	28.1	39.2	82.8	632	20.4	51.4	35.9
85.1	34.9	1	325	23.5	44.1	86.6	799	23.9	41.8	16.7
196	163	3.85	311	59.9	22.9	25.3	470	2.15	6.61	2.81
38.5	17.3	25.7	26.4	10.9	29.4	42.6	322	23.3	37.5	19.3
64.4	50.9	12.7	12.4	3.11	22.5	30	573	25	54.7	20.9
97.3	22.7	17.5	101	31.3	19.6	25.3	352	13.9	36.2	9.82
79.1	28.4	7.3	6.73	66.7	27.4	53.3	1655	40	66.1	20.4
106	24.8	1.35	61	16.1	70.4	108	1018	15.4	31.9	14.2
76.4	30.8	8.51	141	12.1	19.3	34	297	6.15	29.4	118
108	30.8	21.5	41	30.8	6.61	27.4	1094	11.5	30.2	67.3
53.3	34.6	18.3	41	56.2	3.79	30.8	965	3.43	16.4	70.4
27.9	19.3	24.4	106	23.7	14.7	21.3	519	14.9	36.2	16.5
69.8	26.2	21.9	20.4	17	18.9	45.3	533	2.41	9.47	74.3
7.23	5.88	17.8	119	14.1	8.82	23.7	445	3	18.1	66.7
49.1	18.8	14.9	29.4	15	17.6	28.1	470	1.88	21.9	59.4
42.6	15.7	53.3	62.6	16.5	3.79	10.3	552	6.98	44.9	271
16.5	22.9	9.22	10.9	46.1	3.59	13.6	874	12.5	28.1	2.89
101	61	17.9	13	27.9	7.99	11.1	215	5.14	11.4	58.8
59.9	21.9	11.5	17.2	13.3	8.82	24.8	965	9.22	44.9	3.85
102	46.1	11.3	104	13.3	36.8	65.5	914	13.7	33.4	11
142	101	26.9	422	101	11.3	19.5	649	8.43	29.2	138
61.5	17.2	17.8	10.1	16.7	14.9	33.1	542	11.1	20.9	154
54.7	20.4	15.5	35.2	32.5	11.7	18.1	599	1.63	17.5	67.9
50.5	19.5	4.78	13.6	24.8	11.7	28.9	509	18.3	39.6	23.3
34	13.3	26.7	38.2	98.2	34	59.4	704	32.8	63.2	50.9
48.7	19.5	32.8	43.7	44.9	8.58	24.4	466	1.6	20.4	64.9
70.4	25.3	12.3	145	21.1	4.53	24.6	255	4.83	18.8	51.9
45.7	19.1	6.32	94.7	17.2	8.43	16	244	3.08	23.5	93.9
78.4	33.1	25.3	27.4	46.6	66.7	164	3220	17.8	29.7	18.3
17.6	11.4	32.5	94.7	117	23.7	36.5	355	9.82	23.1	18.9
29.4	26.4	15.1	21.5	8.13	15.4	71.7	610	2.07	22.1	57.3
63.8	21.1	7.64	38.2	50	4.41	13.9	461	20.5	31.3	13.2
227	155	28.6	32.8	22.3	10.8	10.1	362	19.6	39.2	12.1
64.4	29.7	13.7	33.4	8.58	7.7	23.1	1252	12.6	25.3	1.11
57.8	15.3	19.5	71	31.6	14.3	17.9	505	18.9	38.9	33.1
75	23.7	13.5	178	31.6	21.5	33.1	255	28.1	43.7	12.5
48.7	25	52.3	109	16.3	6.85	17.8	445	3.85	16	63.8
61	53.3	27.4	32.5	3.72	9.56	25.7	1346	1.42	19.6	79.9
96.5	46.1	16.1	15.5	31.6	3.85	22.3	5.57	6.15	32.5	73
54.7	26.2	12.5	93.9	14.9	11.5	18.6	474	16.4	24.1	7.3
118	39.2	66.1	75	14.1	4.33	11.1	562	18.3	36.5	13.3
96.5	56.2	29.7	39.2	16.1	12.2	37.9	1000	17.3	47	23.1
89	52.8	24.4	18.9	3.85	23.1	42.9	710	21.1	37.9	18.6
25.3	38.5	21.5	48.3	75	19.1	33.7	308	89	138	46.6
96.5	46.1	20.9	51.4	14.5	53.3	118	882	3.34	12.9	30.5
62.6	34.9	18.1	133	30	21.5	24.1	403	9.56	21.3	13.6
18.3	20	47.4	75.7	63.2	13.3	19.3	400	19.3	31.9	29.4
65.5	32.5	12.9	17	12.7	18.8	31.1	334	5.88	33.1	138
85.1	41	14.9	32.2	27.4	38.5	47	777	6.38	23.1	56.2
79.9	25	36.5	26.2	42.6	4.91	9.91	385	5.42	25.9	98.2
42.2	20.2	8.2	26.9	23.9	19.1	40.3	422	22.9	32.5	24.4
61	19.1	10.2	68.5	28.6	10.9	6.55	267	20.5	43.7	21.9
17.5	10.9	6.1	155	21.3	17.2	26.4	389	17.3	47	23.7
36.5	22.3	33.4	63.8	126	9.73	19.8	552	20.9	34.6	15.4
14.6	14.9	21.7	167	31.3	19.1	32.8	286	5.19	15.5	108
17.3	24.4	25.7	26.9	8.58	21.5	36.2	284	17	35.2	14.9
63.2	10.9	65.5	127	29.7	26.9	53.8	337	25.9	38.9	20.5
35.2	16	12.5	157	48.3	15.5	117	1499	28.9	46.1	10.7
57.3	27.6	14.5	173	37.2	5.57	12.4	604	15.8	37.2	18.8
24.4	15.5	15	114	15.8	16.7	30	1000	13.6	20.5	17.3
69.8	40.7	14.6	135	27.9	29.2	42.9	385	14.3	24.1	9.06
74.3	35.9	44.9	53.8	75	10.6	33.1	1382	10.6	28.9	4.26
101	35.5	16.5	88.2	16.8	49.6	72.3	730	17.2	32.5	17.9
41.4	17.2	22.1	21.1	12.7	23.9	34.3	379	1	13.2	8.66
82	66.1	11.4	17.2	32.8	5.28	12.3	158	25.7	63.2	31.9
86.6	38.2	18.8	10.3	2.48	19.5	31.3	382	18.8	30.5	3.49
14.1	7.23	20.7	155	13.5	17.3	86.6	195	20.5	38.2	15.8
89.8	52.3	2.81	14.5	49.1	38.2	83.5	750	25.5	41	15
97.3	41.4	27.6	178	48.3	11.3	27.1	528	3.82	14.6	68.5
26.9	13.7	11	34.9	35.5	17.5	39.2	505	13.9	30.2	10.2
89	21.3	13.7	20.7	15.5	3.31	13.7	407	1.78	1.53	55.2
66.1	23.9	17.6	12.6	20	21.7	35.9	269	24.4	36.5	11.3
129	53.3	25.3	382	87.4	7.64	8.13	305	6.49	40.3	87.4
39.2	19.3	37.5	85.8	46.1	7.23	12.1	599	21.9	47	17.8
25	18.6	4.03	12	36.2	29.7	41	346	5.78	11.9	26.4
45.7	19.3	7.17	98.2	29.7	5.33	22.9	365	23.3	40	21.1
62.1	20.5	25	57.3	12.1	14.9	21.5	422	1	89	1.57
71	32.5	20.2	83.5	131	4.83	20.5	25.3	23.9	37.5	17.8
50	31.6	6.67	11.3	14.9	14.7	113	181	17.5	28.6	9.22
102	31.6	4.41	12.9	21.7	8.58	18.3	523	10.1	33.4	104
63.2	24.6	11.2	16.5	3.11	6.44	17.5	542	3.49	9.82	4.53
233	66.1	14.5	87.4	20.4	13.3	18.4	359	1	18.9	58.8
38.9	24.1	18.9	36.8	17.5	42.6	80.6	1075	11.8	35.9	11.3
98.2	44.1	6.04	23.1	16.1	12	22.7	547	22.9	50.5	15.4
38.9	24.6	8.66	6.49	26.2	22.7	26.7	219	10.7	39.6	71.7
87.4	29.4	22.5	22.7	13.9	26.2	47.8	311	10.8	13.8	9.65
75.7	21.5	1	71.7	2.27	6.26	15.5	418	14.7	28.9	12.7
79.9	18.9	15.7	80.6	23.7	7.77	15.1	396	20	32.8	18.6
52.8	19.5	19.3	54.7	47.4	43.7	57.3	661	11.2	38.9	98.2
63.8	17	33.7	35.2	12.9	70.4	109	1358	9.73	25.9	91.4
107	44.9	7.99	17.6	45.7	7.84	21.1	500	4.53	12.4	69.8
59.4	18.4	17	76.4	16.3	31.1	59.4	667	18.4	51.9	18.4
106	74.3	48.7	61.5	24.8	16	36.2	542	7.7	27.9	167
71	40.7	11.7	16.8	14.5	7.99	16.7	655	24.8	43.3	14.3
21.5	13.1	23.7	24.4	17	4.29	11.1	392	12.3	27.9	29.2
149	51.4	33.7	120	31.6	29.4	54.2	1762	19.1	26.7	8.9
25.9	12.3	17.8	112	18.1	17.9	36.5	346	5	21.1	57.3
64.4	48.3	12.3	30	35.2	13.3	34.9	349	13.7	31.1	16.1
36.2	11.3	15.5	16.4	37.9	15.3	22.9	414	4.14	10.4	68.5
51.9	26.7	12.9	44.5	4.49	30.2	50	302	17.9	22.3	10.3
21.7	7.57	9.65	308	38.2	11.8	29.4	355	8.13	17.2	89.8
93.9	35.9	17.6	14.3	13	23.5	40	300	13.2	24.6	13
56.7	20.5	13.6	88.2	30	24.4	32.5	414	25.3	41.4	16.4
66.1	16.1	11	75	14.3	13.2	29.2	466	24.8	49.6	29.2
27.6	17	11.2	99.1	50	29.7	50.5	1346	25.3	52.8	13.2
49.1	33.4	21.7	19.8	10.1	25.3	39.2	400	25.7	33.7	20.9
157	51.9	12.3	21.7	45.3	5.99	45.3	49.1	7.77	10.3	41
124	33.4	13.5	16.3	17.5	16.1	25	466	9.47	24.1	262
37.9	16.4	34.6	39.2	6.85	2.53	13.9	239	4.07	58.8	89
45.3	25.5	22.1	15.1	13.3	12.3	22.9	474	2.05	23.5	106
163	86.6	33.1	53.8	15.4	40.3	53.3	316	18.9	38.5	13.2
62.6	33.7	8.58	37.2	44.9	5	4.29	400	24.6	45.3	28.6
26.4	15.3	43.7	43.7	13.3	6.04	21.9	1037	30.8	61	14.2
52.3	29.7	13.3	85.1	88.2	11.9	32.2	1446	19.5	43.7	20.7
81.3	24.8	21.5	25	4.53	181	248	621	15.3	34	22.1
95.6	38.2	5	281	64.4	26.4	45.3	496	26.2	48.7	10.4
79.9	29.4	5.05	117	17.3	30	71	828	8.82	22.1	12.6
17.3	14.6	15.1	121	30.8	10.4	14.7	717	16	26.4	8.35
51.4	37.9	42.6	73.7	36.2	15.5	35.5	1219	1.98	17.6	77
38.5	7.3	3.13	17	17.5	29.4	41.8	470	27.4	42.9	16
52.8	53.3	3.65	13.6	42.6	36.8	62.6	1000	12.4	23.5	23.7
91.4	40.3	17	38.2	1.49	10.5	27.1	1009	29.7	50	33.4
37.9	14.2	13.3	32.8	12.1	17.9	42.9	487	2.11	24.8	66.7
55.2	18.8	7.5	32.5	13.6	55.7	97.3	2618	10.1	30.8	58.3
44.5	24.8	15.5	178	45.3	21.1	57.3	982	1	58.3	8.43
70.4	30	20.4	17.3	13.7	19.1	36.8	349	17	53.3	22.3
47.4	30.5	19.8	21.7	31.6	33.1	87.4	400	3.89	36.8	96.5
63.8	21.7	22.7	184	36.2	20.5	26.2	359	3.96	19.8	80.6
23.5	42.9	12.1	29.2	27.4	1.5	8.51	154	20.7	36.2	13.5
5.23	15.1	22.1	93.9	7.7	133	297	1094	9.39	19.6	4.14
14.5	15.4	1	117	3.49	16	29.4	457	20.4	48.3	16
36.8	9.47	12.2	12.6	15.8	20	30	271	12.1	26.2	85.8
97.3	25.3	17.6	12.9	17.3	6.98	9.22	352	12.6	23.3	20.9
16.3	12.1	67.3	149	39.6	43.3	64.4	1027	9.56	15.4	67.3
44.5	31.3	33.1	184	58.8	32.5	43.3	286	1	59.4	3.68
67.9	53.3	17.5	97.3	37.5	22.1	36.8	331	5.42	15.1	94.7
59.4	28.1	18.9	81.3	18.1	79.9	165	2129	8.58	17	7.57
25.9	17.2	21.5	24.1	36.8	15.3	32.2	313	9.91	18.8	9.22
40	32.8	11.3	98.2	19.5	40	75.7	365	19.3	33.7	14.7
60.4	24.8	17	337	60.4	12.7	25	496	9.91	20.5	9.56
50.5	24.6	17	136	30	57.8	91.4	1526	1.54	23.3	59.9
31.1	18.8	6.15	191	13	10.6	21.9	466	13.7	26.7	15
11.2	17.9	17.5	15.1	29.2	12.7	19.3	331	18.8	24.8	10.9
39.2	28.4	23.1	14.2	24.4	92.2	235	1670	8.06	19.3	18.4
72.3	27.1	18.4	37.2	25.7	7.3	23.3	1075	7.04	21.3	35.5
62.1	16.1	25	379	78.4	31.3	50	343	14.1	20.2	9.65
12.7	12.9	30.5	32.8	19.6	3.37	14.1	385	31.9	59.4	28.1
49.6	17.9	7.5	11.1	3.02	67.3	129	737	17	31.6	7.77
62.6	22.7	13.1	125	10.3	5.73	22.5	418	17.3	32.5	12.4
10.8	5.33	23.9	49.1	12.9	11	22.9	483	2.35	21.1	85.8
74.3	26.4	13.5	36.5	50	4.26	17.2	70.4	3	14.7	92.2
73	21.7	6.79	213	23.5	16.5	19.1	429	1.67	44.9	3
10.9	6.38	16.7	145	33.4	8.58	11	305	1.6	13.8	62.6
55.2	18.9	11	123	11.9	11.5	23.9	422	11.2	25.3	14.2
56.7	13.9	18.4	13.5	15.5	5.67	30.2	538	17.9	39.6	14.6
97.3	61.5	11.8	165	34.6	24.6	31.9	433	19.5	35.2	21.5
45.3	19.5	19.3	47	85.8	3.55	30	1124	17.5	44.5	157
45.3	16.5	17	89.8	47	19.5	46.1	407	11.1	27.6	122
248	271	17.8	34	38.9	21.5	38.5	449	2.59	35.5	3.75
58.3	34	19.8	164	35.9	20.5	33.4	313	14.1	32.2	13.9
112	46.1	10.8	133	9.22	4.1	10.8	552	26.9	53.8	25.9
16	15	17.9	153	35.2	12.9	35.5	457	11.2	25.7	1.19
67.3	31.6	26.7	13.5	17.2	31.1	50.5	294	16.1	35.9	1
39.2	15.8	16.5	22.9	17.3	11	28.9	311	3.75	7.91	8.35
68.5	24.4	20.7	63.8	26.2	27.1	33.1	392	2.97	13.6	57.8
59.9	40	6.44	196	25.9	95.6	143	1700	16.8	47.4	16.7
88.2	67.3	36.5	58.8	119	12.7	36.2	429	38.2	136	55.7
13.1	11.2	42.2	154	64.4	21.1	34.9	239	5.38	17.2	73.7
99.1	50.5	14.6	76.4	30	3.92	12	343	13.6	29.4	12
53.3	18.6	22.7	55.7	21.1	17.6	17.2	449	29.2	44.1	21.9
137	50	8.28	29.2	14.5	6.98	17.9	281	4.18	23.5	123
44.5	19.8	19.8	89.8	47.8	3.92	18.9	661	4.29	21.7	126
255	85.8	20	73	34.9	7.23	17	322	12.7	21.1	26.2
55.2	25	31.3	98.2	35.2	3	6.04	27.6	5.57	18.1	7.43
74.3	34.6	13.9	17.2	10.8	9.31	32.5	1286	36.5	73	33.7
117	49.1	1	396	33.1	12.2	27.9	547	2.39	22.1	98.2
44.5	26.4	13.2	69.8	13	15.8	19.3	231	35.5	54.7	27.4
87.4	54.7	20.5	176	33.7	10.3	22.3	426	27.1	27.4	1.73
32.2	14.9	13.7	12.9	15.5	9.06	21.5	528	9.91	23.3	95.6
37.2	14.5	26.9	17.3	13.2	24.1	31.6	300	12.2	34.3	18.4
50.9	24.4	68.5	137	50.9	22.7	40.3	496	42.6	74.3	200
29.4	20.4	35.2	33.1	38.9	26.7	47	340	32.8	53.8	19.1
48.3	7.43	15.5	110	48.7	3.79	17	483	7.04	31.3	92.2
64.9	34.9	5.94	11.3	26.2	68.5	106	615	15.1	40.3	26.9
32.8	23.9	23.7	18.8	5.83	33.4	55.2	806	15.3	37.2	21.5
26.4	17	51.9	47.8	8.2	22.9	37.9	257	50.9	71.7	27.9
69.8	34	24.1	71.7	17.6	13.2	24.6	264	18.1	41.4	23.5
45.7	18.3	8.66	18.4	64.4	10.6	14.9	429	16.1	25.9	10.5
131	37.2	19.1	97.3	30.2	24.1	29.4	313	16	19.1	18.4
106	38.2	9.14	24.1	32.2	18.3	30.5	685	12.1	28.1	19.6
68.5	28.1	16.4	145	16.5	10.7	23.7	573	4.18	30.8	59.9
59.4	26.7	10.1	83.5	1.64	6.79	21.5	346	4.18	23.3	33.7
47	17	42.2	71	44.5	10.8	57.3	538	26.9	50	15.3
56.7	35.9	9.14	30.8	15.4	37.9	105	1625	21.7	30.5	19.8
28.4	12.6	21.1	31.3	45.3	36.2	60.4	835	4.18	15.8	90.6
35.2	19.1	28.6	66.1	60.4	2.71	21.1	599	3.19	14.3	90.6
47	24.1	17.8	257	75.7	7.77	29.2	956	10.8	30.5	11.5
63.2	18.9	20.5	15.4	9.31	21.1	113	1104	23.7	56.2	13.3
62.6	21.1	6.04	209	24.8	5.05	18.4	583	2.79	12.4	8.28
14.2	11.7	24.8	38.9	63.2	6.1	14.2	355	10.7	30.2	10.6
53.8	20.7	16.4	15.3	1.43	12.1	18.4	509	9.65	53.3	217
68.5	27.6	17.5	82	18.6	6.85	24.1	359	1.1	61.5	14.1
119	64.4	10.5	53.8	28.6	8.66	33.4	2480	2.97	31.9	78.4
41.8	11.1	14.9	18.6	66.7	6.79	34	698	13.3	22.3	11.1
44.9	21.7	15	48.7	42.9	2.59	20.9	414	13.9	27.4	9.91
72.3	38.9	1	547	11.2	3.68	13.7	343	15.3	40	18.3
53.3	34.6	2.89	1.11	764	8.66	12.7	219	24.6	63.8	137
31.9	18.9	87.4	130	31.3	7.57	24.6	523	9.47	23.7	16.3
117	59.4	10.8	284	23.1	21.1	30.5	305	7.1	21.1	32.5
45.3	32.8	26.9	137	37.5	3.08	11.5	649	2.33	31.6	57.3
46.6	30	12.9	16.7	14.2	10.1	16.7	262	32.5	96.5	25.7
30.5	8.9	163	379	75	13.2	16.5	514	19.5	26.4	17.8
41.8	12	11.1	28.9	35.9	6.26	22.9	24.4	2.79	15.4	83.5
102	38.2	37.5	244	73.7	14.9	15.3	466	5.28	30.5	122
33.1	26.2	23.7	168	43.3	115	209	791	20	18.1	12.4
44.1	33.4	15.7	21.3	15.5	7.77	19.1	441	2.35	17.5	82.8
15.3	14.9	18.9	17.8	14.1	21.9	23.7	294	8.28	17.9	10.7
85.8	31.3	9.65	73.7	10.8	5.94	17.9	441	22.3	46.6	32.8
32.5	27.1	22.7	22.5	22.5	21.9	33.1	509	21.1	33.7	9.22
54.7	19.3	36.2	50	28.4	12.1	28.9	294	16.1	27.6	15
40	23.7	14.3	19.8	13.7	1.73	5.67	16.8	23.5	42.6	11.5
36.5	16.5	15.5	32.2	9.47	3.34	5.42	257	26.9	47	66.1
52.8	50	34.3	95.6	71.7	29.4	64.9	453	12.3	22.1	21.3
81.3	61.5	20.4	25.9	13.7	40.7	50	422	11.2	28.4	14.5
13.5	30	24.8	255	61.5	29.7	44.5	231	19.3	35.2	15.1
17.5	29.4	27.4	22.9	24.1	22.5	29.2	422	26.9	44.1	4.26
38.2	25.9	45.7	39.6	13.1	20.2	42.6	362	3.43	13	52.8
104	26.2	11.4	11.9	22.1	9.56	15	349	1.36	31.9	1
37.2	12.1	31.3	21.9	10	12	22.3	372	3.34	10.4	75.7
52.3	41	25	53.8	19.3	9.91	20	610	1	52.8	8.9
80.6	25.5	11.8	96.5	9.65	2.76	18.6	13.3	20.2	40	17
227	42.2	16.3	62.6	11.7	2.39	26.2	562	2.27	28.1	20.5
33.4	4.45	17.2	30	28.6	28.9	55.7	429	27.9	37.5	12.5
31.9	16	7.77	24.1	85.8	5.73	7.04	292	10.6	30.2	12.1
73.7	25.3	15.4	120	12.6	4.78	18.8	445	4.74	15.3	114
55.2	55.7	9.56	514	53.8	7.99	15.3	685	14.3	26.7	11.5
37.5	21.9	7.37	23.3	57.8	8.9	14.3	375	18.4	46.1	35.2
25	16.5	9.31	19.5	3.52	106	172	1715	11.3	22.7	16.7
70.4	33.1	8.2	500	93.1	47.8	88.2	1055	2.53	12.1	87.4
31.1	20.2	23.9	400	110	9.14	13.2	567	31.3	80.6	106
47.4	14.1	9.31	20.4	26.2	6.26	8.28	385	14.3	25.3	14.9
86.6	49.1	17.9	4.91	15.3	10.8	17	284	21.3	37.2	11.2
120	45.3	18.6	113	25.5	16.5	38.2	1114	16	31.3	6.55
51.4	37.9	20	19.3	25.7	10.5	44.5	764	17.5	36.8	14.3
27.6	26.2	18.3	64.9	44.1	21.5	30.8	1155	18.1	31.1	8.98
42.2	16.8	16.5	163	8.74	12.7	30.5	441	9.91	17.6	17.6
32.2	28.4	39.6	25.5	11.5	14.7	24.6	319	24.6	44.1	19.8
38.2	24.1	28.1	22.1	30	25.5	47.8	1186	25.3	53.8	39.2
55.7	26.9	28.6	9.47	50	25	43.3	437	3.85	19.6	38.2
47.4	25.5	15.5	35.5	3.65	14.9	18.4	737	4.87	15.4	76.4
40.7	17.2	15.1	15.5	3.62	11.7	21.1	514	24.4	50	119
10.6	14.1	28.4	17.9	12.4	17.6	25.7	365	4.57	12.5	40.3
92.2	30.2	16.7	77	55.7	7.91	26.9	562	2.69	13.3	61.5
33.4	12.7	21.5	48.3	22.9	22.1	29.7	276	3.46	11.3	24.4
25.7	7.84	41.4	29.4	25.5	17.6	28.6	331	14.5	27.6	13.8
63.2	32.5	22.1	292	35.2	4.14	8.28	164	13.8	27.6	1.02
65.5	28.9	11.9	104	28.6	13.6	21.9	337	13.3	33.4	17.5
51.4	59.4	42.2	178	66.1	5.78	22.7	514	9.82	18.3	4
65.5	48.3	17.9	93.1	25.3	9.31	11.9	491	2.86	15.7	57.3
13.3	20.7	18.6	147	35.5	69.2	110	1275	5.73	16.5	16.8
114	39.6	14.1	75	33.1	6.73	23.3	737	13.3	35.2	12.7
141	65.5	46.6	276	112	40	56.2	743	15	26.7	20.7
43.7	19.3	23.7	34.6	19.8	20	35.9	610	1.35	93.1	8.35
3.82	14.6	15.8	8.9	10.3	12.6	26.9	308	46.6	77.7	44.9
93.1	80.6	21.3	17.2	18.4	28.6	43.3	311	8.2	18.4	5.28
50	28.1	22.3	28.6	19.3	9.73	39.2	1472	29.7	59.9	22.7
89.8	17	20.9	85.8	29.7	1	3.16	248	16.3	28.9	19.6
17.2	15.1	21.3	22.1	20	20.9	27.9	379	12.7	25.9	3.4
43.7	26.7	23.3	78.4	43.7	11.5	12.6	483	11.1	31.1	9.06
19.1	15.5	4.37	9.91	22.3	10.8	16.3	491	8.51	27.9	16.4
195	60.4	32.2	11.4	44.5	4.53	13.3	28.4	15.8	25.9	20.7
88.2	33.7	12	56.2	16.7	10	16.3	407	15.5	38.5	11.1
92.2	37.2	22.3	146	19.3	19.1	37.2	325	14.1	27.6	16.1
39.6	11.9	19.3	552	76.4	16.5	27.4	365	13.6	24.6	16.1
93.1	36.5	9.31	349	38.9	11.5	19.3	355	8.58	12.6	23.5
18.3	4.1	14.5	149	25	18.9	39.6	355	4.74	17.5	67.3
63.2	22.7	10.8	106	36.5	57.3	93.1	1046	15	31.9	11.4
43.7	13.8	2.21	316	24.6	15	31.3	828	12.3	23.1	11.8
8.2	17	21.1	85.8	31.3	16.5	26.9	305	23.5	38.5	8.9
26.7	17	1.35	365	17.8	14.1	52.8	1700	10.3	20.7	13.9
50.5	28.1	49.1	60.4	41.8	31.6	51.9	1219	8.58	53.3	12.5
84.3	34.6	5.14	15.8	14.3	13.5	21.5	349	3.46	12.1	62.1
62.6	24.1	20.9	12.9	23.1	40.7	93.1	1794	4.18	12.6	93.1
63.8	21.7	15.4	39.2	8.9	100	233	2458	14.1	32.5	14.5
43.3	21.7	8.66	48.3	42.6	8.98	14.9	557	8.2	34.3	165
79.1	25.5	7.57	93.1	22.1	8.9	19.8	478	20.5	32.8	14.2
10.8	15	23.5	28.4	55.7	1.22	14.7	828	18.9	31.9	10.1
78.4	22.1	30	328	35.2	12.3	22.9	253	16.7	25.9	10.6
90.6	49.1	18.1	105	21.5	22.9	31.9	392	15.8	24.1	11.1
552	389	12.9	161	44.5	17.8	25.9	770	4.03	13.5	26.7
40.7	24.6	61	120	22.9	23.5	50.5	717	45.7	85.8	39.6
60.4	12.7	17.3	175	22.3	12.7	31.1	319	3.65	23.3	55.7
50.5	21.1	17.5	22.3	4.22	25.3	38.9	382	3.52	8.43	71.7
117	38.9	26.7	14.3	10.3	15.1	29.2	843	23.1	36.8	15.1
61	21.7	12.6	82	23.7	10.6	20.5	1346	21.7	36.2	16.4
92.2	42.2	14.5	32.2	37.2	4	17	334	11.4	29.2	70.4
11	9.31	7.43	126	24.1	15.5	26.2	594	18.9	44.1	22.7
170	86.6	29.7	179	47	29.2	43.3	331	4.18	23.9	93.9
54.2	21.9	11.7	229	36.5	36.2	127	939	16.8	40	14.9
18.1	23.5	40.7	91.4	53.8	14.7	28.4	552	4.96	41.4	292
34.9	21.7	41.4	215	83.5	7.23	17.6	538	27.6	57.3	20.4
179	164	15.8	45.7	11.9	17.5	30	730	17.2	25.9	17.9
83.5	48.7	34	107	67.9	17.6	31.1	316	2.05	15	71.7
89	31.6	54.2	79.9	26.9	4	58.8	523	5.47	21.7	54.7
58.8	37.9	5.67	22.3	11.2	34.9	63.8	1946	15.7	29.4	9.91
31.9	11.4	14.1	12.2	6.04	14.9	28.9	470	24.8	39.6	30.8
46.6	19.5	29.2	58.3	47.4	5.38	31.6	457	10.2	32.8	22.1
37.9	10.6	17.6	32.2	14.7	14.6	28.4	244	6.79	14.6	66.1
73	20	13.3	13.6	28.6	2.25	23.1	302	58.3	111	170
42.2	17.9	31.9	75.7	77	24.1	106	1794	15.4	49.6	200
87.4	57.3	24.8	110	40.7	24.4	27.4	359	12	20.4	6.98
41	17	21.1	244	70.4	10.4	16.8	470	19.6	38.5	19.6
50.9	35.2	22.1	22.9	3.19	3.96	12.4	115	32.2	49.6	18.8
10.8	19.3	17.8	29.4	26.9	5.19	10.8	698	4.74	10.1	69.8
77.7	48.7	20.7	21.7	18.6	11	33.1	400	13.5	22.7	14.6
74.3	30.5	22.1	35.5	50.9	126	276	1625	17.6	27.9	17.9
40.7	55.7	11.2	114	26.7	53.3	84.3	956	12.4	26.7	15
77	20.4	12.6	25.7	37.5	3.55	12.4	562	10.1	25.5	26.7
14.3	5.42	13	89	1.64	8.2	21.9	414	21.3	33.1	23.1
51.9	33.7	15	43.3	12.5	20.9	35.9	403	93.9	170	40
33.4	24.1	9.14	18.9	54.7	44.9	102	1334	28.9	69.2	47
75	46.6	2.84	457	37.2	6.55	19.8	389	20	31.1	11.5
1.61	11.4	34.3	31.3	7.04	49.6	81.3	791	8.51	30.8	155
53.3	21.5	6.44	253	23.1	9.47	26.2	334	3.4	27.6	79.1
85.1	32.2	16.8	32.5	64.4	3.02	27.9	207	26.4	38.9	11.8
50.9	28.6	25.3	56.7	38.2	29.4	60.4	717	9.73	19.3	14.7
25.9	22.9	33.4	93.9	26.7	5.57	14.9	615	16.1	33.7	17.5
85.8	62.1	53.3	325	239	12.9	24.6	403	10.6	14.3	12.2
94.7	37.5	72.3	96.5	33.1	25.5	46.6	588	4.7	17.2	28.4
40	18.4	24.4	63.8	35.2	6.15	16.4	81.3	15.5	27.6	15.7
77	46.1	35.2	90.6	41	16.1	25.9	396	2	76.4	14.3
28.6	22.5	40.7	204	66.1	20	29.2	239	1.32	36.2	1.79
92.2	56.2	15.3	19.1	12.7	9.14	9.39	322	11.1	20	18.9
14.6	11	8.35	175	32.2	8.35	25.9	965	23.9	35.2	5.19
54.2	17.9	19.8	22.1	18.8	27.1	41.8	319	10.9	23.9	13.2
29.7	18.9	3.43	14.7	23.5	2.76	9.65	276	1.95	79.1	4.87
31.1	23.9	1	843	82.8	16.4	30.2	474	8.06	21.7	6.61
75	21.1	39.2	33.4	2.23	18.1	28.4	302	19.5	36.8	12.6
42.9	23.1	4.14	200	16.7	19.1	45.3	1252	25.7	27.9	17.9
82.8	26.9	7.84	142	3.85	17.6	25.3	297	34	71.7	33.7
426	255	11.5	58.3	15.8	7.77	16.3	685	5.52	6.44	3.62
54.2	33.4	20.4	20.5	22.3	20.9	33.1	269	18.9	46.6	18.3
88.2	19.5	22.3	81.3	16.4	4.57	16.5	542	18.4	33.4	14.1
12.4	21.1	14.2	14.1	61.5	16	33.7	835	10.4	21.5	8.06
147	85.1	15.4	59.4	111	21.1	27.9	297	1.18	8.82	41.8
58.8	24.1	18.3	16.7	9.47	2.21	10.6	1.95	1.6	5.38	5.38
48.3	12.3	24.1	17.3	1	1.55	19.5	42.9	21.1	34.3	18.6
107	50	13.6	67.9	23.1	20.9	27.1	331	3.11	12.1	33.7
79.9	122	23.7	20.5	15.5	10.7	22.7	407	3.65	20.7	59.9
77	36.2	23.9	29.4	10.9	15	27.9	375	22.3	35.9	11.7
52.3	34.9	10.1	32.2	36.8	23.9	35.5	231	14.1	18.8	11.5
69.8	23.1	17.6	445	109	24.8	38.5	179	21.1	47.8	22.7
84.3	33.7	21.1	38.2	24.4	9.82	13.1	519	28.6	55.2	16.7
59.9	30.5	8.51	6.55	8.74	10.4	22.3	368	13.7	25	14.3
47	25.9	13.6	16.4	13.2	23.5	46.6	1241	18.4	35.2	22.9
74.3	16.5	53.3	47.8	50.9	22.3	37.5	461	22.1	49.1	14.2
8.28	19.3	18.9	161	35.5	26.2	44.1	191	17.6	38.2	20.9
66.1	53.8	11.1	20.5	26.9	5.19	15.7	573	8.9	11.4	38.5
47	23.1	18.6	28.1	18.4	11.3	30	743	28.4	47.8	19.3
23.5	27.4	2.44	122	15	18.1	28.4	294	3.82	19.5	155
12.3	6.38	7.37	111	18.6	3.11	18.8	496	14.2	34	13.5
15.8	10.5	12.6	18.9	14.2	17.5	32.5	316	31.1	46.6	19.6
21.1	25.3	11.4	109	22.3	20.2	31.9	385	17.2	29.4	11.7
12.7	10.2	11.5	130	28.6	20	25.7	359	6.21	29.4	27.1
15	13.2	26.2	28.1	13.5	11.2	44.1	2035	7.17	17.2	12.6
69.2	28.6	4.57	389	45.3	1.81	14.5	204	22.7	38.2	10.4
9.65	3.05	31.3	106	40	28.1	46.1	470	15.8	20.7	7.91
43.7	21.5	12.2	53.3	59.9	6.79	15.3	362	29.4	52.8	38.9
32.2	21.5	5.88	136	18.3	96.5	175	578	3.34	23.3	83.5
37.9	12.3	11.2	57.3	10.6	16.7	46.6	1611	15.3	39.2	23.1
48.3	33.7	15.7	11.3	28.1	7.5	32.5	1310	11.2	27.9	20.9
33.1	17.3	5.99	93.9	26.4	11.5	41.8	692	4.57	18.4	3.02
45.7	28.9	12.1	13.7	40.3	5.88	13.3	403	23.7	43.3	8.28
22.1	5.78	30.5	17.3	7.3	7.1	19.5	418	28.4	57.8	20.2
40	16	10.2	18.9	31.3	5.19	17.2	922	25	59.9	35.9
31.1	20.2	8.74	11.3	67.9	42.6	54.2	343	2.44	6.92	73.7
97.3	36.5	21.7	57.3	4.18	4.74	40.7	505	16.1	31.6	14.9
31.9	23.9	7.57	40.3	19.1	56.2	93.9	1625	10.7	18.4	10.3
38.2	13.9	30.8	211	92.2	14.1	17.5	547	17.5	39.6	16.7
51.4	25.7	7.91	23.3	24.1	7.04	14.9	470	42.6	58.3	2.97
56.2	19.8	9.14	17.2	10.6	16.8	71.7	1894	12	23.5	16.3
75	26.4	25	163	35.5	19.6	30	250	15.8	28.9	12.4
55.7	23.9	8.06	16.7	25.7	16.4	21.7	573	35.2	63.2	17.8
50.9	31.6	11.1	8.28	21.3	1.22	14.2	604	1.19	63.8	7.5
83.5	26.9	13.7	52.3	46.6	18.3	22.9	292	19.3	47	20.4
67.9	28.4	18.4	255	40.7	119	173	621	6.44	13.1	77
57.3	26.7	14.6	109	21.5	1.89	9.56	396	19.6	39.6	16.8
34.9	54.7	11.8	105	18.4	19.6	77	163	8.9	31.9	33.7
66.7	24.8	16.7	19.1	18.9	30.8	61	1252	18.8	36.5	25.9
39.6	45.3	21.3	110	38.5	10.1	30.5	685	18.8	34.6	22.3
47.4	27.9	7.04	25.7	39.6	5	16.7	319	10.3	27.1	5.78
40.7	22.3	14.9	38.5	7.04	6.38	29.7	19.6	32.2	64.9	51.9
52.3	25	15.3	29.4	9.31	17.6	17.9	316	15.4	41	146
18.9	15	10.6	172	21.5	21.9	28.4	372	1.39	50	6.32
41	23.1	20.9	11.8	8.9	21.3	37.2	784	3.19	21.9	65.5
47	33.7	22.9	33.7	20.7	18.6	35.5	267	12.9	34.6	13.7
33.1	19.3	9.39	18.4	33.1	27.6	30.2	407	9.56	16	9.91
20.2	15.5	8.2	150	40.3	16.3	33.4	331	3.65	11.5	83.5
75	32.2	24.6	20.5	16	21.3	25.5	284	27.6	47.8	30.2
25	10.7	9.73	27.1	15.4	11	19.1	302	3.13	18.4	71
5.57	13	14.6	112	32.8	16.4	27.4	528	2.21	24.1	69.2
21.5	9.73	14.5	91.4	17.8	2.71	16.8	552	6.1	19.3	6.92
53.3	22.5	17.6	15.5	9.91	21.3	34.3	313	23.1	38.9	16.7
59.9	26.9	20.4	196	69.8	18.6	49.6	947	4.57	18.8	133
54.2	23.3	9.22	26.7	49.1	17.5	33.4	478	10.9	25	5.28
90.6	38.9	15.7	33.4	16.7	25.7	34.6	359	3.34	19.3	97.3
73	30.2	44.9	349	130	13.8	22.9	359	11	29.7	114
38.9	14.9	24.1	82.8	17.2	21.5	21.5	271	13.6	31.9	14.7
21.5	12.7	27.6	53.3	53.3	25.3	44.9	325	19.3	25.3	9.65
64.9	46.6	26.2	21.9	14.1	24.1	31.1	375	12.1	27.1	7.99
27.1	18.1	15.7	40.7	16.1	21.3	39.6	264	15.8	28.9	11.1
57.8	27.4	6.61	14.7	18.1	28.1	32.5	349	10.3	26.7	9.73
39.2	13.2	35.2	26.4	59.4	45.3	72.3	813	12.1	27.6	10.2
40.7	24.8	15.8	6.67	45.3	13.7	30.5	461	15	22.1	48.7
31.6	17.5	8.9	196	20.5	6.61	13.2	365	17.5	23.1	20.5
88.2	39.6	27.9	89.8	35.9	6.21	24.1	698	40.7	73.7	45.7
99.1	53.3	17.2	101	26.7	38.5	70.4	552	2.48	7.91	89
91.4	18.3	21.5	28.4	4.66	29.2	55.2	588	29.4	77	200
50	28.1	12.3	117	16.3	27.6	40	223	5.94	24.4	103
47	30.2	22.3	37.5	18.3	2.11	14.1	23.9	2.21	22.7	80.6
53.8	22.1	15.8	11.4	10.8	11.7	34.9	193	3.34	14.5	77
32.2	17.6	16.4	88.2	37.2	9.56	22.5	557	16.1	31.1	18.4
66.7	44.1	14.5	15.4	8.13	15.4	34	392	22.7	37.9	17.9
40.3	14.6	12.2	64.4	20.7	19.1	29.2	382	22.1	36.2	17.8
14.3	8.43	11.2	15.4	55.2	9.47	33.4	1104	26.9	44.1	13.6
57.3	35.5	15.3	21.7	20.2	19.5	38.5	396	2.62	27.9	8.9
2.97	7.23	14.2	73.7	6.85	17.5	25.5	195	1.76	8.43	75
13.1	1.53	34	66.7	11.1	12.6	24.6	355	1.53	19.3	75.7
95.6	33.1	22.7	47.4	12.9	34.3	44.5	237	5.67	16	82.8
36.5	19.3	18.4	16.3	33.7	13.2	106	400	17	35.9	13.5
91.4	26.2	22.9	43.3	27.1	20.2	36.2	328	12.2	22.9	3.02
70.4	41.4	18.3	83.5	14.5	43.7	77.7	1219	11.9	22.7	15.8
73.7	29.4	27.1	188	74.3	13.2	32.2	259	20.9	35.9	9.14
142	107	45.7	138	75	26.4	45.7	403	14.6	21.7	11.9
34	13.3	33.7	271	71	4.41	39.2	982	20.7	28.9	9.65
82.8	35.2	25.5	92.2	64.4	7.99	26.9	632	14.5	25	11.8
53.8	23.9	14.1	70.4	4.07	9.22	10.5	334	6.04	12.9	75.7
62.6	43.3	26.7	170	28.4	3.75	10.6	389	11.2	18.9	10.9
42.6	22.7	14.3	204	33.7	56.2	87.4	578	5.62	22.3	102
25.9	11.7	23.7	32.2	24.1	16.7	42.9	483	4.18	19.3	40.3
50.5	32.2	42.2	47.4	28.4	27.4	46.1	470	5.28	13.2	36.2
8.66	5.38	8.28	102	15.4	19.5	18.1	407	11.2	28.1	163
31.9	22.1	20.9	145	26.2	12.7	20.7	334	15.7	35.2	12
31.9	22.5	15.7	32.5	26.9	7.43	25.9	655	17.9	44.1	14.7
43.3	21.7	21.7	16	22.5	2.81	12.3	757	8.35	26.4	13
56.2	34.9	25.9	6.21	1	19.6	37.9	352	1	3.82	5.14
47.8	34.9	13.5	21.7	13.9	9.56	19.1	483	1.55	25.3	87.4
14.3	22.3	10	31.6	29.4	5.52	21.9	334	14.2	26.4	10.3
31.6	23.5	31.3	14.5	14.1	10.3	16.8	478	5.09	12.1	50.5
58.8	19.1	19.6	100	19.8	9.65	45.7	939	2.09	13.9	61
34	20.2	16	37.9	16.3	16.3	25	264	11	27.4	36.8
37.9	32.8	31.6	131	16.4	44.9	73.7	308	1.63	21.5	95.6
31.6	21.7	26.7	51.4	18.6	14.7	49.6	1186	26.2	58.3	19.5
102	50	42.2	78.4	32.8	17	57.3	1114	6.32	18.1	101
25.3	14.5	28.9	65.5	37.9	47.4	66.1	264	18.3	35.9	5.14
14.7	44.9	29.2	276	76.4	45.7	65.5	403	27.1	49.6	21.1
41.4	20.7	12.1	18.3	14.9	7.84	21.5	1155	6.32	16.4	9.31
20.7	8.98	19.1	39.6	26.9	14.6	23.5	368	19.5	38.5	14.3
15.5	26.2	19.6	20.2	11.3	8.74	28.4	407	8.58	21.3	34.6
56.2	34.9	17	20	15	7.3	22.7	973	3.08	15.3	60.4
23.5	23.9	12.7	21.1	32.5	15.8	31.6	271	5.94	19.5	18.3
73.7	14.1	50.5	82	23.9	25.3	47.4	1134	20.2	23.1	8.9
55.2	20.7	21.7	27.4	12.5	14.5	41.4	1407	22.3	28.1	21.5
32.2	21.3	17.9	89.8	27.1	4.14	17.8	372	43.7	59.9	19.5
65.5	38.5	20.4	133	37.2	59.9	110	1358	2.74	13.9	98.2
28.6	47.4	17.8	66.7	27.9	12.4	20.2	414	16.7	31.1	11.2
28.9	16.5	20.2	23.7	4.14	4.7	18.9	7.43	1.68	91.4	3.55
25.5	15.8	13.7	300	42.9	16	27.4	284	19.5	34.9	20.5
37.2	25.3	17.5	82	24.6	7.77	16.8	426	16.5	26.7	6.79
79.9	28.6	2.67	300	40.3	29.2	52.8	626	7.7	25.7	189
43.3	15.5	1.06	202	24.6	20.2	30.5	379	12.1	24.6	16.3
36.2	20.7	23.9	20	11	10.6	21.3	453	4	9.91	54.7
77.7	40	18.9	22.7	14.2	10.9	39.2	362	4.07	21.5	136
89	24.4	37.2	35.5	10.8	9.73	11.3	337	12.5	25.9	8.13
114	26.7	9.47	124	24.4	13	20.5	284	3.4	13.9	1
63.8	22.1	5.78	8.74	14.2	17.6	31.3	362	5.83	21.9	34.9
37.2	11.1	23.5	100	26.7	15.7	73.7	519	30.5	82.8	19.1
75	44.5	24.1	11.8	20.7	6.67	14.5	422	24.8	35.2	6.61
68.5	21.9	12.7	95.6	32.2	8.51	15.8	343	25.7	56.7	21.5
23.1	12.1	25.3	36.5	17	14.1	29.4	392	15.7	26.4	16.5
55.2	32.8	16.3	16.4	25.7	24.1	49.1	806	6.32	11.7	54.7
12.6	8.06	4.91	19.5	69.8	8.28	23.5	542	11	29.7	89.8
102	79.9	15.4	17	5.23	5.33	11.1	422	7.57	42.2	149
79.9	28.9	25.7	24.6	10.4	24.1	29.7	274	10.3	16.1	67.9
83.5	31.1	22.5	67.3	28.6	12	25.3	178	33.1	66.1	34.9
80.6	40.7	16.8	14.2	4.1	20.2	33.4	239	3.96	7.17	82
58.3	46.1	19.6	153	18.6	4.57	1.7	113	106	153	34.3
61	27.9	32.8	52.8	11.2	12.9	30.5	271	12.2	19.3	9.47
50.9	15	16.5	17.5	5.42	44.1	82.8	1176	8.43	21.9	15.4
15.3	16.7	21.9	106	40	9.47	22.5	429	33.1	51.4	17.8
49.1	24.6	10.1	145	14.3	12.3	24.4	453	26.2	37.9	17.6
42.9	24.6	24.8	59.4	20.7	22.5	41.8	407	21.1	44.9	18.8
57.3	30.8	48.7	9.73	64.4	15.5	27.4	523	7.84	24.1	92.2
14.5	40.7	19.6	426	73	15.3	33.1	334	3.02	20	79.1
89.8	19.3	16.5	15.8	1.3	43.7	79.9	1731	12.1	24.6	8.74
58.8	17.6	24.8	179	61.5	17.3	69.2	717	2.04	30.5	86.6
139	110	23.5	496	84.3	20.7	40.7	410	20.2	40	19.3
36.5	18.4	3.25	9.73	38.9	4.22	13	241	16.3	36.5	20.9
18.8	19.5	25.9	322	51.9	10.5	23.1	365	3.79	10.9	73.7
35.9	15.1	10.8	85.8	21.3	10.1	23.7	414	21.9	53.8	27.1
36.8	19.6	22.3	106	27.1	11.5	21.5	294	2.02	11.1	86.6
62.6	27.6	77	53.8	16	7.77	14.1	331	18.6	39.6	12.9
52.8	28.4	16.3	108	44.9	16.4	30.8	213	18.9	32.2	19.5
51.9	24.4	23.3	124	41	10.8	20.7	331	27.9	61	32.8
8.43	19.8	18.9	139	49.6	15.7	26.7	294	1	101	6.21
37.2	16.7	14.7	81.3	13.3	9.39	24.8	328	24.8	41.4	32.8
69.2	37.2	21.3	40	21.5	13.6	28.1	359	12.2	26.4	59.4
24.6	16	23.7	392	113	16.8	29.2	355	12	47	191
42.9	20.5	18.4	64.9	42.9	4.03	11.1	400	29.2	37.9	15.4
84.3	18.6	17.2	25	9.56	5.99	13	311	21.9	36.8	13.7
48.3	36.8	28.9	36.2	12.7	29.7	44.1	257	16.3	27.4	10.8
31.1	12.6	3.96	13.2	47	27.4	41	346	2.53	12.5	82.8
37.5	31.1	22.1	27.9	27.9	18.8	37.2	573	1.88	33.1	54.7
27.6	20.2	14.5	122	26.9	8.35	12.1	418	19.6	35.9	22.5
37.9	13.7	6.32	12.7	48.3	54.2	78.4	1230	8.13	18.8	10.6
150	55.7	39.6	70.4	85.1	51.9	88.2	649	23.1	42.2	20.4
51.4	22.5	15.4	21.7	14.3	16.8	32.8	365	9.31	14.9	41.8
38.5	19.1	22.1	23.1	5.94	29.4	33.7	271	30.5	58.8	59.4
63.2	37.2	37.9	81.3	39.2	316	621	1472	18.1	30.8	9.73
26.9	19.8	25	20	7.1	13.1	30.2	851	5.94	30	239
26.9	14.7	8.9	85.8	8.58	9.39	19.8	505	20.5	39.2	25.7
61	17.3	32.5	34.9	26.7	20.7	126	150	12.5	52.8	264
51.9	23.5	37.2	54.7	2.5	22.5	37.2	300	33.7	55.2	38.2
34.6	14.5	17	100	15.8	22.1	26.7	204	23.3	48.7	47.8
97.3	28.4	30.5	44.9	12.5	15.5	26.4	267	7.84	54.7	343
6.26	21.1	1	137	4.29	6.15	15.5	1446	11.3	18.9	9.91
17.5	36.2	4.26	429	40.3	10.3	39.6	85.1	23.3	66.1	12.1
2.74	3.96	38.2	37.9	9.56	47	71.7	1144	25.9	50.5	113
48.3	28.6	26.7	84.3	29.7	5.67	16.5	491	5.38	38.5	121
53.8	38.5	20	14.2	9.73	8.06	15.8	407	17.2	26.4	19.3
62.1	20.7	14.7	14.5	8.13	9.31	24.8	414	3.49	33.7	204
61.5	26.2	4.96	92.2	24.8	18.4	20	599	11.5	18.4	6.55
62.6	37.5	61	155	21.7	12.9	14.1	375	23.1	47	26.2
103	37.9	10.6	47	8.98	17	32.8	255	2.69	44.5	1.95
40.7	9.39	23.1	18.6	2.44	6.44	19.5	331	8.58	20	7.99
107	27.9	11	141	31.9	14.2	27.4	337	11.2	24.6	10.4
106	55.2	18.4	16.5	10.4	19.1	30	286	4.26	15.7	71.7
41	28.4	20.7	13.8	17.3	15.7	90.6	991	26.7	43.3	23.5
18.9	11	14.2	8.66	34.6	153	239	704	32.5	41.4	13.9
35.2	23.5	25.5	22.3	4.03	9.47	12.9	331	13.6	36.2	10.1
39.6	17.3	13.8	111	51.4	12.2	18.1	400	2.15	93.9	3.37
17	6.73	7.23	55.7	8.2	3.59	29.2	649	19.5	39.6	7.37
92.2	31.3	9.82	36.2	88.2	5.88	12.1	382	8.06	20.5	7.3
25.5	18.9	16.7	28.9	4.83	8.43	13.6	661	15.8	37.9	18.4
63.8	28.6	20.5	19.3	6.98	20.9	26.7	382	11.1	22.7	30
22.5	44.5	12.7	157	12.1	22.7	27.1	445	17.9	40	12.7
38.9	14.3	18.9	167	36.5	5.23	5.19	519	15.7	24.6	23.5
20.5	6.79	17.8	164	47.8	13.2	20.5	547	15.1	35.2	12.9
89.8	40.7	21.9	16	24.1	23.3	51.9	1084	4.41	12.3	60.4
109	69.2	13.6	77	5.52	75.7	107	562	19.3	35.9	30.2
62.1	25	59.4	109	31.6	31.1	52.3	947	28.4	49.1	5.67
37.5	19.5	21.9	93.9	31.9	15.8	25.7	352	27.4	34.3	17.8
64.4	22.3	36.5	359	62.6	11.8	21.7	461	13.3	20.9	10.8
30	24.8	16.7	79.1	42.2	16.8	33.1	1346	12	30.5	16.8
35.2	16.1	36.8	47.4	10.5	10.3	14.3	1046	36.8	98.2	62.1
60.4	15.5	13.6	70.4	40.3	8.43	21.3	250	23.7	40	29.7
34.9	31.6	21.9	246	78.4	10.6	34.6	461	37.2	59.4	32.5
47.4	34.6	7.04	33.7	37.5	7.37	10.9	407	31.3	50.9	33.1
18.1	29.2	17.6	40.3	38.5	12.3	16.8	461	6.85	11.5	29.7
52.3	32.5	12.4	50.9	22.3	18.1	32.8	352	8.06	28.9	4.83
66.1	24.6	38.5	123	37.9	13.1	22.3	365	11.4	39.6	92.2
18.6	29.2	13.5	17	13.7	17.9	21.1	346	11	23.5	15.3
38.9	23.3	12.4	27.9	48.3	2.19	12.6	63.8	8.66	21.7	26.9
92.2	16.7	5.62	7.43	27.6	55.2	76.4	784	16	28.6	8.2
139	56.7	51.9	41	47.8	17.9	43.3	1155	11.4	31.1	34.3
92.2	36.5	3.75	113	17.6	24.8	32.2	319	3.85	18.1	23.5
78.4	30.5	19.3	89.8	33.4	4.22	31.9	813	1.58	18.8	54.7
23.9	23.7	28.4	30	7.43	16.8	33.7	223	4.26	41.8	136
92.2	30.8	20.2	21.5	6.1	26.9	51.9	1526	1.78	22.5	84.3
35.9	28.1	12.1	135	25.9	6.26	12.6	429	17.6	27.6	11.2
64.4	18.1	23.7	16.4	3.37	16.3	34	355	9.91	20.9	6.32
82	28.1	13.2	79.9	33.4	8.43	17.8	594	29.7	47.8	83.5
55.2	20.4	25.5	15.7	16.4	23.3	34	319	11.1	27.4	4.37
39.2	26.2	22.5	105	22.7	15.4	24.8	382	33.1	89.8	30
66.1	33.4	48.7	55.2	17.8	11	28.1	679	11.5	23.3	26.4
62.6	23.9	24.8	35.5	8.28	9.82	27.1	441	9.73	27.4	53.8
53.8	15	12.9	67.9	7.17	22.3	38.5	292	1.47	9.39	71
17.5	15.5	25.9	26.4	14.6	15.4	36.5	217	35.5	77	20
53.3	24.1	7.57	86.6	20	23.7	45.7	1027	10.7	20.7	10.2
33.1	17	9.82	26.7	44.1	15.8	25.3	583	17.8	39.6	21.5
71.7	25.9	24.8	104	37.5	20.5	35.5	308	23.3	46.1	31.6
29.4	16.7	18.9	95.6	34.6	13.6	22.5	322	24.1	34.3	12.9
62.1	24.4	8.43	7.5	15.5	8.43	21.3	429	24.6	37.5	24.1
48.7	20.7	15.7	77.7	23.5	12.3	36.8	679	1	85.1	9.47
50.9	18.4	49.6	52.8	23.5	8.9	18.1	491	18.4	39.2	12.5
13	4.37	11.9	41	17.9	7.23	31.1	1486	18.8	46.1	20
50.5	25.7	24.1	17.6	15.5	9.65	20.5	418	4.18	40.7	68.5
38.5	15.8	15.3	47.8	61.5	20.2	25.5	274	10	32.8	14.2
42.2	44.1	7.99	85.8	20	28.9	54.7	441	24.4	34.6	8.82
104	32.8	30.5	97.3	25.9	21.5	35.5	349	15.3	27.1	15.1
110	53.8	25	85.1	31.3	27.1	42.2	267	4.61	47	33.7
34	26.9	17.8	80.6	18.6	24.6	31.9	269	18.6	40.7	14.6
91.4	39.2	15	16	38.5	6.79	21.1	466	22.9	36.5	17
35.5	37.5	4.03	21.9	13.7	4.87	17.3	523	3.55	16.5	69.8
55.2	14.1	28.4	115	37.5	33.1	76.4	1346	14.5	26.9	9.22
37.5	16.4	18.6	41	5.19	2571	3555	4491	14.6	36.2	24.4
42.2	22.9	26.7	28.6	4.78	16.4	25.9	392	28.9	38.5	21.1
49.1	35.2	24.6	115	10.8	42.2	71	704	2.41	19.1	105
67.9	25.9	17.6	16	19.3	9.47	32.2	704	30.5	55.7	40
59.4	39.6	18.9	14.1	16	7.3	23.3	168	31.3	50.5	20.2
34.3	21.9	25.5	64.9	27.4	10.5	31.6	300	8.06	21.3	5.99
164	41	70.4	193	65.5	41.4	49.6	331	24.4	41	12.3
36.5	8.82	24.1	12.9	4.53	16.4	26.4	155	25.9	40.7	19.1
48.7	32.8	1	118	10.3	1.54	14.3	610	2.69	35.5	58.8
76.4	32.2	22.5	89	16.1	11.4	22.5	478	10.7	20.4	3.49
25.7	20.5	28.4	85.8	26.4	47	86.6	470	21.9	36.8	14.5
12	13.7	19.5	15.7	13.2	65.5	111	2091	1	98.2	4.74
112	18.8	19.1	41	6.38	10.9	30	441	16.5	27.9	15
82	55.7	26.9	96.5	13.3	5.42	12.5	449	5.99	15.8	1
47	18.1	16.3	26.4	8.98	19.3	36.2	528	30.5	40.7	10.9
59.9	21.7	26.2	79.1	20.5	19.6	31.1	250	20.7	26.4	12.4
31.1	12.2	3.82	25.9	33.1	6.73	9.56	343	39.6	80.6	39.2
37.5	20	3.89	7.57	14.3	20.9	39.2	302	10.8	28.1	7.57
55.7	16.8	49.6	37.2	18.3	16	24.6	297	19.1	33.1	31.1
8.43	17.8	27.9	103	35.5	8.51	19.6	289	11.1	28.6	16.3
59.4	18.8	13	33.4	44.5	24.6	55.7	1512	34.3	76.4	34
69.8	30.5	33.1	117	55.7	10.6	28.1	806	2.5	23.5	57.8
40.3	15.5	15	63.8	29.4	26.4	43.7	649	11.2	26.2	10.4
38.9	9.82	32.8	47.4	66.1	14.6	28.9	300	11.3	20.9	4.03
31.3	23.5	31.3	155	41.4	6.49	14.2	449	15.4	25.9	16.1
72.3	17.2	24.4	24.8	17.6	7.17	37.5	63.2	2.71	21.1	97.3
48.3	15.5	16.8	167	36.2	11.5	18.6	414	12.4	14.9	13.8
18.6	10.3	63.2	51.4	24.8	7.84	13.9	505	5.78	13.9	71.7
54.2	13.7	20	14.2	25.9	5.28	14.5	34	10.2	25.5	9.06
33.4	13.6	107	176	59.9	26.4	34	284	1.37	18.9	63.2
37.2	16.4	6.1	7.99	12.6	26.4	59.4	1208	14.5	22.1	2.27
43.3	16.4	17.6	24.6	7.3	22.5	25	319	4.1	24.1	5.33
64.9	32.2	7.99	34.3	3.79	3.65	12.2	119	21.1	36.8	22.9
78.4	38.2	11.7	149	21.9	17.5	32.5	286	24.4	45.7	34.6
38.2	13.5	18.6	30.2	12.7	10.8	20.5	375	4.57	40.7	79.1
20.5	15	13.9	135	34.9	2.71	27.6	638	18.6	38.2	13.9
54.2	46.1	24.6	19.6	22.1	18.6	37.5	346	24.1	42.6	32.5
45.3	18.8	16.4	30.8	4.37	18.3	32.2	316	8.2	23.3	24.6
41	21.3	16.1	20.4	10.1	71.7	132	599	37.9	54.7	22.3
46.1	27.9	13.9	17	15.5	17.5	39.6	311	8.66	24.4	1.64
22.3	20.9	6.61	33.1	9.56	6.61	14.9	505	12.7	29.4	12.2
14.2	12.3	18.1	73.7	28.4	6.61	13.6	322	2.79	8.82	39.2
47.8	30.2	14.6	83.5	58.8	9.22	39.6	737	28.6	42.2	22.1
33.7	11.1	23.9	17.8	8.13	9.65	21.5	519	43.7	89	22.9
72.3	26.2	4.03	19.5	46.1	4.57	17.2	655	12.6	27.9	18.4
50.9	22.7	17.5	118	24.4	21.7	32.2	319	7.43	24.4	66.7
126	58.8	167	331	118	9.22	22.5	183	4.49	25.9	95.6
35.2	17.2	26.7	59.4	13.2	4.83	43.7	777	34.3	45.3	16.3
26.4	16	17.5	18.4	11.7	8.43	17.3	441	8.43	25.7	107
69.8	44.5	16.4	188	34.9	42.9	66.7	1114	19.1	48.3	25.3
24.1	17.2	17.6	88.2	15	12.6	29.4	284	18.3	38.9	12.7
4.87	14.5	10.8	195	38.9	20.5	39.6	176	11	22.5	5.88
56.7	24.1	8.35	20.5	31.6	7.5	21.9	461	4.29	13.2	62.1
15.4	26.4	16.4	55.7	15.3	15.4	25	457	7.7	19.3	14.2
46.1	23.5	10.4	73.7	12.5	5.42	14.2	519	17	26.4	18.4
41	18.1	18.3	79.1	15.4	17.5	28.1	365	22.7	34.6	11.2
41.4	30.5	14.2	126	27.6	20.4	43.7	300	14.2	24.8	22.9
65.5	33.7	12.2	14.5	10.2	14.2	28.4	229	5.42	30	94.7
60.4	34	1	491	42.9	41.4	71	638	28.4	42.6	17.6
77	20.7	65.5	56.2	33.7	20.9	35.5	414	3.02	14.2	62.6
63.8	23.7	1	118	10.9	51.4	100	1334	22.9	54.7	17.8
104	38.2	28.1	27.6	86.6	14.3	23.5	474	24.8	27.6	9.73
70.4	38.9	36.5	62.1	19.3	24.4	42.2	349	4.03	10.9	18.8
77.7	79.1	24.1	21.3	17	14.9	25.3	279	18.8	42.2	20.7
78.4	28.6	16.5	150	53.3	12.4	26.2	496	33.4	74.3	29.7
19.8	36.5	21.1	28.1	14.3	18.6	39.6	274	27.1	38.2	6.61
56.2	26.9	20.5	21.5	10.7	24.4	37.9	316	3.89	14.7	77
322	231	15	441	63.2	46.6	72.3	269	51.9	92.2	79.1
46.6	21.3	17.5	56.7	35.9	46.1	75	359	25.9	39.6	16.4
33.4	20.5	24.8	18.8	20	18.8	45.3	743	14.9	26.2	14.2
93.1	33.4	12.6	77.7	26.7	31.9	40.7	294	28.4	66.1	41.8
111	49.1	15.7	11.9	25.3	12.7	25.3	259	3.43	12.3	62.6
33.4	17	30.8	47	64.4	3.62	18.4	437	27.4	35.5	20
33.1	28.9	26.7	22.9	4.66	18.9	41.8	509	13.3	21.3	11.4
50	15.7	34	59.4	85.8	15.4	29.4	449	13.1	34.9	73
52.8	20.7	18.8	20.4	13.2	1.29	8.58	334	20.7	38.2	17.6
90.6	33.4	14.2	21.5	63.2	17.3	34.9	372	11.7	17	12.7
86.6	15.8	20.7	104	19.5	21.1	31.9	229	7.43	38.2	89
40.3	22.5	16.1	20.2	23.7	7.99	20.5	578	22.7	43.3	11.4
18.8	10.3	29.2	262	61.5	36.5	52.3	305	23.1	36.2	15.1
13.7	13.9	19.8	20.9	16.1	4.74	15.8	63.2	33.1	36.8	2.13
60.4	83.5	17.5	16.5	7.91	5.67	18.8	35.9	1.1	19.1	51.9
70.4	23.7	1.72	400	47.8	10.8	29.4	523	46.1	90.6	59.4
27.9	3.62	19.5	25.3	16.4	24.1	39.6	334	6.92	15.7	127
47.8	31.3	15	106	30.5	23.1	29.2	253	1.65	28.6	55.2
29.4	25.9	26.4	35.5	6.15	21.3	41.4	626	23.3	52.8	29.2
86.6	24.4	18.6	17.8	12.6	91.4	173	858	9.73	20	16.7
126	105	23.5	64.4	36.2	7.1	18.4	422	16.8	25.7	18.4
54.2	26.9	15.4	13.5	3.11	18.4	35.5	319	10.6	23.3	15.1
34.6	13.8	9.56	200	25.3	8.28	17	542	9.31	10.6	34
62.1	22.3	16	24.1	22.1	11.2	38.5	649	8.74	19.3	17
60.4	22.1	27.6	21.9	10.1	5.47	20.2	939	18.4	48.7	168
84.3	23.1	18.4	61	21.3	6.79	32.2	723	9.82	28.4	14.1
43.3	22.1	10.8	106	16.1	7.04	13.2	757	5.05	10.7	41.4
66.1	28.4	30.8	198	30	10.1	27.6	426	18.1	31.1	10.6
25.5	13.2	22.3	12.7	32.5	7.91	31.3	385	15.5	30	84.3
32.8	12.6	12.3	17.8	48.3	28.9	51.4	799	10.6	17.3	7.5
19.5	49.6	6.1	16.1	28.1	17.3	31.6	649	20.9	44.9	16.8
46.6	22.1	17.6	27.1	15.4	62.6	99.1	2072	19.3	38.2	25.3
41.4	11.7	89	207	52.8	24.8	43.3	410	1.76	28.6	82.8
42.2	27.6	21.5	67.9	12.3	8.28	15.8	562	21.9	29.7	8.28
62.1	21.7	9.56	6.49	34.3	15.3	23.1	319	11.9	35.5	50.9
103	32.2	10.2	13.2	50.9	5.28	5.62	239	14.5	22.9	5.23
77.7	23.7	24.8	60.4	44.5	21.5	25	289	32.2	83.5	27.1
46.6	15	8.51	120	22.3	6.1	20	478	20.9	36.8	9.65
