# Supplementary material
Source: ML conference proceedings conference paper supplement (https://openreview.net/forum?id=N9RyL52z7y)
Supplement: supplementary_material [file 2. cd3cd28icam2.xls]

## Sheet: Sheet1
praf	pmek	plcg	PIP2	PIP3	p44/42	pakts473	PKA	PKC	P38	pjnk
36.5	22.3	17.5	142	9.06	16.1	22.1	661	6.55	27.6	20.2
47.8	31.9	34	426	41	2.07	3.79	27.1	13.9	26.9	74.3
79.1	62.6	19.5	19.3	13.8	9.39	32.5	483	9.82	24.6	54.2
17	10.1	41.4	284	49.1	23.3	33.7	621	12.5	25.5	77.7
41.4	28.9	13.8	81.3	11.5	28.6	44.5	379	8.82	26.7	52.8
29.2	10.7	12.5	15.4	15.8	14.2	29.2	626	6.73	54.2	6.38
61	26.7	9.82	8.98	9.39	24.8	34.6	500	5.88	12.9	31.9
33.1	32.8	87.4	403	64.4	7.1	14.1	1252	6.98	23.3	14.9
106	102	69.8	359	68.5	10.9	25.5	828	4.78	15.1	5.78
33.7	5.62	26.2	168	22.9	20	24.4	414	9.22	28.6	31.6
52.8	26.9	25.5	106	19.8	7.43	67.3	352	8.06	25.7	40
22.3	26.7	44.1	153	42.6	12.6	22.9	939	13.2	20.4	70.4
41.4	29.4	13.9	23.9	1.79	9.91	23.9	1286	20.5	61.5	138
76.4	50.9	20.5	22.9	3.59	2.33	4.74	50.9	15.8	29.7	82
92.2	92.2	27.6	39.6	2.37	34.6	62.1	820	4.29	14.9	37.9
73.7	41	75	217	58.3	21.7	41.8	1894	8.35	16.1	38.5
49.6	30.8	51.9	276	51.4	5.52	11.3	737	4.41	10.7	10.7
172	153	43.7	233	16.1	20.2	35.2	704	7.3	18.6	36.5
50	32.2	97.3	392	89	13.2	20.7	673	10.2	22.9	30.8
47	42.2	25.3	16	14.1	6.67	29.7	325	6.85	36.5	24.8
42.9	35.5	22.5	24.6	15	14.6	32.2	661	28.1	76.4	117
106	71.7	28.9	157	29.2	11.4	23.9	542	5.23	23.7	58.8
57.3	38.2	27.1	26.9	10.9	9.14	19.3	207	13.6	35.5	44.5
22.9	25.3	14.5	124	21.9	72.3	133	2548	5.05	6.15	25.9
41.4	22.9	28.9	22.5	7.57	9.65	50.5	237	19.3	45.7	105
48.3	18.4	13.9	132	12.5	12.5	33.1	882	49.1	107	211
85.8	56.2	65.5	72.3	17.9	21.9	32.8	737	18.3	14.6	23.3
73	54.7	20	151	30.5	28.1	38.5	723	16.5	32.2	33.4
28.6	33.7	13.9	204	27.4	22.5	37.5	679	3.92	17.3	36.8
86.6	79.9	16	136	13.8	18.4	28.9	626	10	18.3	23.3
113	88.2	47.8	93.9	43.7	20.7	35.2	491	10.3	22.3	35.5
28.9	21.1	17.6	19.1	6.49	9.56	20.9	973	2.71	20.7	3.13
129	75.7	13.7	125	17.9	6.49	15.8	334	14.2	53.8	27.4
26.4	29.4	17.6	81.3	16.7	17.8	36.5	1554	15.1	30.2	56.2
41.4	23.9	44.9	426	49.1	19.1	34	956	2	75	11.9
41	25.9	62.1	219	38.2	6.73	16.3	334	5.47	19.5	18.4
29.7	30	17.3	80.6	9.65	11.1	24.4	457	18.8	47.4	73
38.5	33.7	37.2	382	20.7	18.1	27.6	649	11.3	16.7	32.8
35.9	26.7	18.8	41.8	11	98.2	231	1794	23.3	56.7	109
39.2	23.1	12	160	23.1	11.3	21.9	1263	5.47	17.9	11.5
48.7	28.6	62.1	302	94.7	35.5	60.4	717	11.2	34.3	44.9
69.2	43.3	25.3	22.3	1.93	21.7	42.9	791	9.31	24.1	29.7
147	87.4	26.9	20.4	20.7	32.8	47.4	777	20	56.2	103
89.8	62.1	23.1	30.8	4.57	8.9	31.1	583	59.4	126	121
39.6	36.8	29.4	40	12.6	9.22	10.2	231	8.82	26.2	37.5
34.9	23.1	12.6	117	13.9	14.1	17	509	9.39	40	43.7
142	94.7	28.9	13.8	5.67	11.3	24.6	644	8.28	6.55	7.7
33.7	33.4	14.2	181	11.2	12.1	24.8	483	10.5	30.8	46.1
25.7	35.2	46.1	92.2	20	33.4	50.9	599	3.75	48.7	50
217	132	23.1	132	16.5	18.4	37.2	1155	7.3	17.5	22.7
38.2	24.1	57.3	365	56.2	40.7	79.9	1230	33.1	77.7	168
71.7	40	27.1	47	219	14.5	25.3	939	12.7	23.9	63.2
155	106	96.5	426	58.8	24.4	44.1	604	33.7	66.7	66.1
34.3	25.5	18.4	24.1	7.5	3.46	13	583	10.6	17.5	8.74
121	84.3	27.1	21.9	5.33	8.82	30.5	717	4.83	18.9	31.6
85.8	52.3	20.2	38.5	16.1	5.94	27.4	241	9.91	21.9	40
157	97.3	28.4	25.5	6.04	13	21.9	414	7.77	19.5	41
113	66.7	19.8	44.9	12.3	17.9	25.9	679	7.04	36.8	18.8
41	29.4	15.4	15.7	15	6.55	9.39	1310	12.1	18.9	59.4
146	97.3	49.1	69.2	16.7	15.4	29.2	547	5.94	9.06	20.4
34.6	20.5	18.8	20.9	4.07	30.5	120	1382	10.7	19.3	37.2
99.1	98.2	34.3	193	10.6	25.3	41.8	820	12	28.9	43.3
46.6	24.4	33.4	13.7	31.1	21.5	36.8	890	10	27.4	2.23
107	76.4	18.3	135	13.8	14.7	27.9	1018	39.2	110	126
67.3	36.8	30.2	138	11.7	12.6	20.2	610	9.06	20.9	32.2
97.3	73.7	55.2	379	82.8	16	28.4	764	31.9	79.9	75
51.9	21.5	11.1	188	13.6	5.62	25.5	207	29.7	76.4	132
39.2	29.2	40.3	302	72.3	7.43	18.8	698	1.53	1.45	7.64
38.2	22.3	26.4	38.5	16.7	1.75	10.9	588	7.37	20	21.3
103	78.4	20.5	16.8	1.45	15.7	33.7	679	30.5	64.9	69.8
90.6	63.8	17.6	26.9	6.85	10.6	28.9	1104	32.8	88.2	151
45.3	32.8	19.3	120	20.5	39.2	58.3	655	10.3	22.3	29.4
14.9	21.3	22.3	16.5	10.6	5.99	3.43	161	13.2	26.7	16.7
151	121	29.2	129	30	18.4	32.8	982	7.5	36.8	45.7
44.1	33.7	41	325	31.6	10.6	36.8	470	1.03	59.4	6.38
39.6	28.6	43.3	71.7	7.77	44.5	67.3	661	10.3	21.7	21.5
96.5	69.8	32.5	64.9	8.2	13.2	25.3	770	56.2	141	205
41.4	24.4	18.6	23.3	6.38	16.1	26.2	906	13.6	40.3	42.6
53.3	34.9	19.3	47.8	10.1	3.49	17.2	173	18.9	53.3	55.2
274	172	29.7	20.4	12.9	41	56.7	533	16.4	28.1	44.5
113	36.5	40	246	40.7	20.9	28.4	379	8.06	30	25.5
161	112	44.1	84.3	28.4	36.8	50.9	583	1.36	1.72	11.1
225	163	82.8	112	23.5	24.4	36.5	717	40.7	72.3	202
31.3	24.8	8.43	305	14.3	7.43	26.2	346	5.05	21.5	18.1
60.4	42.2	23.9	31.3	1.96	9.22	15	1046	9.06	21.7	42.6
176	97.3	24.4	145	15.7	14.7	21.3	820	7.77	19.6	20.9
30.5	32.8	10.2	136	5.94	30.5	55.7	791	14.1	20.5	48.7
57.8	31.6	11.5	157	36.5	11.2	27.1	626	10.3	32.2	29.4
308	200	16	93.9	29.7	17.8	31.9	655	11.2	17.5	7.1
31.3	40.3	20.7	163	17.6	11.5	31.3	866	36.2	76.4	79.1
27.1	21.3	93.9	500	63.2	35.5	57.8	542	10.6	27.6	3.92
47.4	21.1	44.1	179	23.5	11.2	20.2	478	10.3	37.5	34.6
51.9	27.1	15	167	1.84	13.9	16.4	621	18.6	46.6	33.1
48.3	20.9	20.5	64.9	13.7	29.7	47	1065	5.73	3.02	15.7
112	83.5	21.3	23.3	9.31	33.7	51.4	835	7.91	23.7	18.4
57.8	40.7	16.8	362	22.1	11.2	27.9	799	9.22	22.9	55.2
38.9	28.1	35.5	24.4	1	12.5	15.1	1334	13.6	22.7	30.2
117	78.4	19.3	17.9	6.85	33.4	48.3	947	12.5	17.5	1
68.5	107	18.3	31.1	19.5	11.1	22.9	599	12.2	27.1	14.3
36.8	24.8	21.7	98.2	18.3	7.91	19.8	403	8.74	25.9	38.5
38.2	29.2	21.1	129	24.6	12.4	30	723	6.67	10	21.5
47	26.2	15.4	84.3	18.3	9.06	27.1	965	11	18.4	26.7
253	157	25.7	121	18.6	25.9	42.2	965	11.9	17.9	36.5
96.5	46.1	13.6	136	3.43	16	32.5	505	13.5	20.5	46.1
191	115	13.1	12.5	3.31	21.7	25.7	514	11.4	12.9	17
59.9	29.2	12.2	76.4	21.9	18.6	24.8	583	9.73	15.1	8.35
61.5	37.2	158	557	110	2.64	12.9	461	12.1	26.7	27.6
34.9	25	34	26.7	2.71	1.45	6.1	34.3	27.1	61	90.6
34.6	34.6	13.2	87.4	16.8	12.5	23.9	407	7.23	27.6	42.2
170	123	16.5	8.35	1.73	20.2	29.2	757	32.8	78.4	186
21.3	15.3	69.8	239	51.9	58.8	70.4	578	16.3	27.1	42.2
44.9	28.1	21.1	142	13.1	16.8	20.7	692	17	38.5	41
33.7	20.4	25.5	24.6	6.73	11.9	58.3	325	13.9	14.9	32.5
200	125	16.5	308	15.1	37.2	38.2	777	24.8	43.3	100
35.5	23.5	23.7	25.9	12.3	16.5	25	874	66.1	183	279
26.4	23.3	120	514	117	23.5	43.3	799	10.8	30	58.3
41	41	18.1	167	19.8	4.1	15.4	615	13.8	22.5	20.5
157	79.1	20.4	33.7	25.7	4.37	19.3	858	49.1	106	155
83.5	54.2	60.4	48.3	14.9	31.3	51.9	621	14.1	16.4	25.3
109	143	22.1	108	22.5	15.3	35.5	649	20.9	58.8	53.3
145	93.9	34.3	474	62.1	15.7	21.5	429	10.8	22.5	21.9
41	11.8	15.4	75	13.9	25	30.8	626	8.06	26.4	15.7
30.2	26.7	32.8	191	28.1	18.3	19.6	723	54.7	139	191
40.7	13.1	25.3	22.7	1.17	11.4	25.7	685	14.6	24.6	20.7
38.5	20.2	50	368	60.4	8.74	28.1	483	11.4	26.4	40
37.2	56.7	18.4	21.3	10.8	14.1	31.1	621	13.1	23.5	36.2
195	106	13.9	135	3.72	24.1	43.7	414	10.8	24.8	38.5
29.4	31.1	45.7	52.8	8.82	26.7	47.8	523	10	23.3	29.4
60.4	48.7	13.6	29.7	2.35	213	322	1554	8.35	20.9	23.7
60.4	40.7	27.6	22.1	5	18.6	41	1124	7.7	23.3	17.9
64.9	53.3	71	466	73	7.77	19.8	1114	12.4	20.2	12.6
58.3	31.1	79.9	77	8.58	19.6	28.4	638	15.3	36.5	50.9
36.5	25.7	22.5	76.4	13.5	17	27.9	730	12.2	36.2	30.5
163	117	26.9	362	53.3	4.83	20.7	157	22.3	76.4	85.8
41.8	23.1	22.1	101	26.2	36.5	44.1	750	11.4	36.5	33.4
36.5	22.3	49.6	56.2	10.2	22.9	37.2	704	29.7	77	153
142	85.1	25.3	33.1	26.9	12	24.1	939	80.6	101	12.2
90.6	61.5	10	18.8	21.1	18.6	31.3	931	5.09	100	1
73	46.1	15.5	113	8.2	13.3	22.3	621	13.5	21.9	30
39.2	19.5	16.4	64.9	9.65	14.6	26.2	750	12	22.9	25.9
86.6	55.2	23.3	22.7	4.91	4.87	9.65	136	36.5	86.6	118
42.9	25.5	15.7	23.1	3.72	30.2	41	730	22.1	46.6	7.23
55.2	42.9	17.5	95.6	6.98	5.62	21.3	610	10.2	23.7	26.2
64.9	41.4	20.7	168	22.9	14.6	25.7	661	12.6	25.5	42.6
36.2	18.6	34.9	34.9	11.3	13.2	20.4	791	1.11	10.5	18.4
59.9	35.2	64.9	257	42.2	12.6	28.1	730	1.86	3.79	4.03
51.9	30.2	22.3	136	16.8	14.1	23.7	835	10.7	20.5	13.5
54.7	49.1	20.9	161	12.3	21.9	37.9	1155	13.5	32.2	35.5
44.9	31.3	23.9	30.2	8.58	26.9	71.7	1094	10.3	23.1	25.3
284	233	50.5	422	35.5	1.36	9.82	898	34	55.2	11
35.5	28.4	13.2	191	13.8	9.14	24.1	500	12.5	27.9	35.2
92.2	80.6	15.4	167	9.39	2.57	10.7	19.3	13.7	37.5	15.5
112	67.3	17	90.6	10.4	39.6	58.3	588	8.28	26.2	40.7
35.5	25	46.1	248	35.5	9.22	15.5	632	10.8	31.9	30.5
44.9	27.6	18.6	117	16.8	12.5	14.6	679	6.21	14.9	9.39
132	82.8	16	20.9	12.6	1	2.17	1	17.2	25.9	33.7
23.9	10.3	18.8	21.3	1	4.18	10.9	219	8.98	19.6	29.2
34.6	25.5	14.2	89	16.4	25.9	50	1298	10.8	51.4	7.77
135	73.7	18.9	105	6.49	25.5	62.6	1911	6.21	17.3	15.5
31.9	31.1	25	16.5	7.57	12.1	19.3	704	1.98	64.9	4.49
30.8	20.2	21.1	23.5	14.5	30.8	55.7	1382	51.9	113	115
33.7	15.1	49.6	453	49.1	27.9	45.3	523	49.6	92.2	209
80.6	58.8	28.1	56.7	8.58	9.82	14.6	594	9.73	17	27.9
34.9	19.8	14.7	94.7	4.91	51.9	89	1981	11	41.8	41.8
176	91.4	15.7	149	12.3	45.7	72.3	1827	6.15	13.1	3.89
15.4	3.02	20	17.2	21.7	20.4	31.3	567	7.37	23.3	25
142	91.4	57.8	102	18.9	12	13.6	305	4.03	10.6	12.9
41.8	24.1	18.4	18.3	8.66	19.8	38.5	422	39.6	83.5	158
26.4	18.3	17.6	44.1	10.4	13.2	20.2	667	8.58	20.9	23.3
72.3	47.4	16.5	79.9	9.22	8.06	24.6	710	7.77	25.3	32.2
32.2	10.8	12.6	27.4	10.6	18.6	40.7	813	22.3	32.5	41.4
225	125	14.6	11.1	1.54	11.5	31.1	407	3.37	66.7	9.22
40.3	34.9	24.8	27.9	6.61	1	1.67	33.4	15.3	42.6	44.5
122	89.8	9.22	173	3.72	23.5	28.6	1037	10.4	29.4	6.79
53.3	38.9	18.3	22.1	6.85	35.5	80.6	2308	20	45.7	66.1
36.2	23.7	36.8	328	51.9	9.22	13.3	679	42.2	92.2	122
37.5	22.1	17.3	14.6	12.2	18.3	27.9	583	16.7	41.8	59.4
79.9	66.7	22.1	24.1	3.92	15.5	27.9	542	13.1	36.8	33.1
72.3	39.6	18.6	7.04	14.5	39.6	47.4	389	15.4	31.1	33.7
101	67.3	22.3	68.5	5.67	30.8	39.6	594	10.4	27.1	13.9
6.67	7.99	48.3	308	48.7	6.98	34.3	470	11.5	33.4	28.6
42.6	25.5	20.2	17.5	10.1	7.17	20.9	474	11.4	24.6	23.9
57.3	26.9	84.3	461	75.7	12.2	29.2	567	11.7	13.9	23.5
65.5	28.6	18.1	93.9	7.37	22.7	31.1	562	91.4	125	15.7
93.9	50	14.6	93.9	14.5	47	62.6	685	9.65	21.5	29.7
59.4	36.8	31.6	67.9	47	11.3	21.1	698	12.9	35.9	40
31.6	22.9	26.4	18.1	7.64	11.5	33.7	632	14.2	20.9	26.2
30.5	21.7	16	255	6.73	8.51	21.7	414	49.6	97.3	193
41.8	26.4	48.3	302	40	35.9	62.1	1334	10	32.5	33.1
178	125	11.7	2.59	13.9	6.38	16.4	403	12.4	44.9	25.3
57.8	50	13.3	145	13.9	14.9	10.2	820	12.7	16.7	18.8
18.3	16.4	28.1	43.7	10.3	43.3	63.8	710	5.83	21.3	26.2
131	119	78.4	250	48.7	90.6	126	466	3.59	7.99	1.08
54.7	38.9	16.8	21.7	24.1	26.7	43.7	882	36.8	58.3	18.8
67.3	31.3	1	7.5	389	21.3	25.3	621	7.04	22.1	22.1
28.6	18.1	31.1	36.2	10.9	15.7	36.5	1000	3.05	31.3	27.4
61.5	57.3	33.1	16.4	10.2	11.9	43.3	229	5.73	16	16.4
40.3	23.3	31.9	39.2	2.57	6.79	13.7	692	11.3	28.1	29.7
36.2	18.1	46.6	528	49.6	16.1	40.3	965	14.6	33.7	15.7
38.9	16.4	24.4	195	39.6	11	20.4	496	9.56	30.8	17.5
41	30.8	20.9	25	1	12.4	20.2	685	10.8	35.2	30.8
91.4	53.8	17.5	18.8	5.57	13	22.3	496	12.9	27.9	4.14
188	117	20.5	16.3	1	4.91	5.47	973	3.31	10.3	11.1
184	85.8	8.98	213	6.79	20.2	24.1	730	13	33.4	28.4
37.5	17.6	6.61	181	13.9	23.9	39.2	644	13.2	33.7	56.2
50	33.1	19.6	22.9	5.88	5.73	20	698	6.61	17.9	30.8
139	82	20.7	24.8	4.66	36.5	41.4	483	4.49	59.4	3.82
101	57.8	17.9	62.1	11.7	20.7	42.2	470	10.6	37.5	21.7
53.3	40.3	14.3	106	18.3	32.5	62.6	898	31.3	60.4	88.2
58.3	44.5	21.9	17.3	5.67	37.9	89	1946	12.1	31.1	37.5
175	126	14.1	137	5.09	102	160	2788	15.4	30	50
34.6	25.5	32.2	35.9	10.9	2.29	7.37	125	13.9	25.7	29.4
11.8	17	49.1	410	54.2	15.7	36.2	1219	10.1	22.1	19.6
38.9	32.8	129	308	73	2.48	12.6	906	12.6	29.4	16.7
34.3	26.9	54.2	79.1	32.8	9.14	13.5	410	14.1	30.5	20.9
38.9	5.38	22.3	87.4	22.1	20.5	49.6	1046	5.38	5.42	4.87
37.5	15	40.3	44.5	14.5	9.22	14.9	610	1.22	5.52	11.4
33.7	21.5	18.9	217	9.22	14.1	18.6	542	10.4	19.3	40.7
22.1	23.3	30	22.7	6.44	19.6	35.5	939	15.1	26.9	23.9
35.9	25	93.9	474	77.7	97.3	158	1747	1.12	3.43	22.9
37.9	18.1	14.9	153	5.28	10.2	26.7	389	48.3	118	138
21.1	15	24.8	25.7	5.38	9.65	36.2	737	11.2	29.7	24.4
31.1	24.4	19.5	248	29.4	21.7	34.6	505	13.6	22.9	19.3
57.8	42.9	25.7	35.9	2.86	8.28	11.3	259	5.42	55.2	5.57
56.2	29.2	47.4	262	36.5	1.51	13.5	667	8.58	11.9	4.1
7.7	10.9	13.1	89.8	11.4	9.31	20	410	9.31	21.5	25
112	76.4	44.1	487	67.3	15.1	21.1	505	8.82	13.9	7.99
31.1	26.7	33.7	198	32.2	8.66	18.3	1197	5.33	8.98	9.06
71	42.9	17.9	44.1	8.74	8.35	12.7	1094	10.6	44.1	44.5
52.3	32.8	23.5	217	14.6	24.1	35.5	939	37.5	79.1	133
149	96.5	59.9	302	40	4.41	16.4	137	6.38	20.7	16.5
65.5	32.8	13.3	122	16.7	7.1	13.1	655	12.5	22.9	43.3
44.5	37.2	18.4	250	28.1	20.5	21.3	533	3.55	16.8	28.1
126	89	37.2	300	33.7	26.7	41	723	49.6	99.1	154
59.4	36.8	10.2	157	14.6	11.7	24.4	349	12.1	20.2	21.7
32.8	32.5	28.1	235	19.8	8.51	18.4	698	9.47	30.8	25.5
22.1	18.8	18.1	27.9	10.6	14.1	23.7	487	13.5	36.2	33.1
30.2	22.9	21.1	175	21.1	23.1	76.4	1263	7.84	22.3	18.8
69.8	44.5	17.6	92.2	8.43	9.73	20.2	661	40.3	70.4	67.3
40.7	22.1	35.5	200	42.9	7.17	11	533	13.7	28.4	27.6
50.5	32.5	22.9	26.7	5.57	3.4	14.5	235	5.19	13.7	11.8
106	85.8	19.5	86.6	10	49.1	67.9	483	7.1	25.5	36.2
142	90.6	17.3	66.1	18.4	15.3	40.3	730	5.62	23.1	21.9
184	132	21.1	21.1	10.4	5.88	40.7	1252	46.1	115	145
50	31.6	15.5	61	11.7	16.3	34.9	874	40.7	107	106
138	109	65.5	359	60.4	8.2	14.3	533	12.4	28.6	8.82
55.2	32.2	13.6	142	10.2	9.47	25.5	346	7.7	23.5	28.4
42.6	18.1	17	15.5	1.21	13.9	15.3	487	9.73	9.39	12.9
78.4	74.3	25.9	110	42.2	17.2	42.9	626	10.4	18.6	35.2
37.5	25.9	24.1	27.6	3.85	17	47.8	692	38.5	64.9	57.3
21.1	6.55	24.6	28.1	3.68	15.5	41	882	7.7	10.8	14.7
76.4	43.7	8.82	235	22.7	23.1	40.3	583	25.5	44.1	51.9
61.5	64.4	16.1	163	2.71	25.5	34	487	7.7	23.9	29.4
66.7	44.9	22.9	68.5	25	28.4	56.2	453	9.31	18.8	24.6
56.7	25.9	21.3	21.3	16.1	22.1	32.5	922	9.06	23.9	27.1
85.8	21.9	18.6	25.3	4.61	13.6	26.7	422	11	21.5	22.1
39.6	28.1	20.9	18.8	15.3	24.1	39.2	604	13.6	31.3	39.2
31.1	23.7	20.7	176	14.7	5.05	20.7	271	13.5	30.8	36.5
29.4	20	16.5	46.1	5.83	14.7	43.3	461	28.6	47.4	3.13
18.4	19.1	44.1	231	62.6	59.4	93.1	3619	24.4	56.7	77
33.1	14.1	24.8	23.3	4.45	7.91	14.5	1155	4.14	12.6	4.29
52.3	33.1	54.7	334	47	87.4	146	2864	16.7	25.5	33.1
39.6	25.3	12.1	88.2	3.08	26.2	48.7	1395	31.1	60.4	74.3
39.6	20.2	93.1	505	58.8	5.52	30.8	1843	7.1	18.4	18.8
35.9	13.5	12	186	21.5	15.8	35.5	991	13.1	16.4	42.9
58.8	40	22.5	63.8	23.1	11.3	15	528	67.9	97.3	3.89
95.6	59.4	49.1	437	50	13.6	24.6	588	49.1	115	164
32.2	25.9	28.6	204	20.5	45.3	74.3	2148	6.38	26.4	27.1
33.1	21.7	13.8	103	10.5	12.9	22.7	509	9.14	22.7	29.7
36.8	83.5	24.6	115	12.1	37.2	47	813	12.6	21.5	29.7
47	26.9	27.4	19.5	8.35	7.37	18.4	649	11.3	30.8	36.8
34.6	30	18.3	109	9.82	112	189	2525	10.3	20.9	22.9
38.5	23.5	5.42	4.83	12.6	37.5	55.2	599	36.8	81.3	110
204	130	23.7	21.5	4	15.5	34.6	737	12.9	15.1	32.5
2.37	2.29	78.4	379	57.8	9.65	29.7	478	15.5	17.8	44.5
26.2	39.2	24.8	44.9	16.3	50	90.6	1407	31.9	62.1	74.3
27.9	17.9	45.7	141	26.2	19.6	34.9	947	15	22.3	29.2
96.5	62.6	106	359	65.5	11.1	24.6	750	6.79	40.7	34.9
191	121	15.8	106	11	12.9	22.5	638	8.98	18.9	21.5
31.3	17.8	24.1	15.4	10.1	22.5	39.2	552	31.1	97.3	207
43.7	25.7	9.91	113	9.06	40	58.8	483	17.8	47	88.2
35.9	25.7	49.6	362	46.1	35.9	55.7	1877	9.39	21.9	27.6
36.5	28.4	16.1	106	4.41	11.7	28.6	604	76.4	163	198
163	94.7	17.5	23.9	6.92	13.8	46.1	400	8.13	11.8	17.3
25.5	22.7	44.9	248	223	44.1	89	3078	35.5	70.4	103
34.9	24.6	29.4	41.4	13.8	20.7	56.7	478	8.9	19.1	13.7
30.2	16.7	18.8	62.1	14.1	12.7	32.2	717	4.83	26.2	36.8
229	165	21.3	25.5	1.09	59.4	129	2436	9.91	20	15.5
43.7	27.4	78.4	385	72.3	45.7	80.6	1611	9.14	16.5	13.8
133	95.6	18.4	57.3	1.88	12.4	35.9	562	18.3	41.4	46.1
23.3	30.2	31.3	202	43.3	58.3	104	1670	19.8	42.6	109
33.4	21.5	23.7	32.2	4.57	11.7	34.6	359	14.1	26.9	34.6
49.1	41.4	17.8	122	18.3	10.1	10.2	965	13	34	27.9
37.5	22.3	24.4	67.3	26.7	9.65	16.5	300	8.9	13.5	9.56
30	15.5	15.3	56.2	12.3	37.9	47.8	604	6.04	24.1	10.2
38.5	32.8	11.7	7.5	11.4	61.5	154	3078	14.1	21.5	5.62
36.8	25.3	41	146	54.7	10.2	25.7	1382	14.1	34.6	27.6
31.9	15.3	19.5	15.8	5.09	16.5	42.2	1700	63.2	98.2	34.9
189	121	21.3	27.9	14.6	29.7	44.9	661	2.13	67.9	5.88
28.4	17.3	20	101	13.7	6.15	8.9	239	10	20.4	20.9
170	103	15.5	32.5	3.02	39.2	59.9	2763	5.42	23.1	27.1
37.9	21.9	52.3	322	39.6	22.7	41	483	8.74	17.8	30
31.9	21.1	25.3	26.9	11.5	2.21	9.56	118	9.65	22.3	21.3
47.8	31.6	24.6	98.2	8.9	42.9	110	1512	9.22	29.4	49.1
27.9	20.9	39.2	103	44.9	33.1	62.6	764	6.73	23.5	25.3
28.6	15.8	17.9	61.5	11.3	12.4	17.5	704	3.13	20.2	20.5
132	130	56.7	237	52.8	23.1	36.2	483	9.22	27.4	35.2
33.4	23.5	111	433	136	7.99	16.7	410	56.7	118	142
85.8	47	25.7	89	8.9	67.9	108	1486	45.7	123	84.3
39.6	27.9	14.2	80.6	10.7	17.9	30	547	31.3	66.7	112
35.2	22.9	13.9	102	20.7	31.1	64.4	1715	8.66	30.5	22.5
76.4	47	24.4	19.1	5.23	11.9	27.6	538	11.7	23.5	20.7
34.3	38.9	22.1	30	7.17	10.6	19.1	538	17	46.1	59.4
50.9	16.8	16.3	331	52.3	15.5	32.8	750	10	18.3	25.9
35.9	22.5	16.5	15	7.1	5.14	10.3	661	20.9	51.4	72.3
32.2	24.1	21.5	13.9	5.78	46.1	85.8	1322	2.37	40.3	26.7
36.5	36.8	32.5	36.8	11.4	25.3	32.2	509	4.96	20	25.3
57.8	37.2	5.38	12.1	4.7	16.7	38.2	991	11.9	31.3	31.1
49.6	35.5	16.8	200	42.6	34	51.4	552	16.1	22.3	34.3
27.9	17.6	16.8	105	22.7	13	32.5	2035	10.6	29.4	28.4
53.8	27.1	30.2	13.5	1.3	93.9	170	2308	13.5	26.4	46.6
30.2	20.7	17.2	44.5	2.04	25	43.7	835	10.6	23.5	8.66
35.5	22.1	23.5	131	7.1	16.4	32.2	1670	12.1	30.5	44.1
40.7	25	14.3	167	26.2	10.5	17.8	914	8.51	30.2	30.8
43.7	22.1	21.1	125	16.1	16.3	16.4	514	18.1	32.5	44.5
127	132	16.7	233	30.8	14.5	39.2	644	3.96	20.5	8.9
89.8	49.6	12.3	163	15.8	9.73	18.1	784	20.9	69.8	68.5
23.1	21.7	25.3	17.3	11.3	14.3	30	835	9.82	25.3	14.2
36.8	17.6	9.47	161	25.3	52.8	92.2	2072	8.13	10.3	16.1
30.5	26.7	36.5	34.9	13.1	50	105	2308	41	89	112
59.9	46.1	25	35.5	8.74	43.7	91.4	1778	41.4	97.3	145
23.7	40	10.2	122	1.76	13	21.7	858	34.6	77.7	98.2
49.1	32.2	17	157	20.5	6.26	12.7	757	11.5	17.5	20.7
35.9	25.7	21.7	28.4	13.1	16.3	28.6	692	56.7	85.1	27.1
28.4	21.7	19.3	168	17.2	26.2	95.6	2969	11.2	38.5	58.8
89	51.9	17.5	21.1	7.5	5.78	10.6	973	15.7	79.9	27.4
27.1	30.8	23.1	16.5	4.33	13.3	39.6	982	12.5	25.7	42.6
172	110	11	221	23.9	63.8	118	3134	9.65	19.8	26.4
68.5	47	30	28.1	11.8	20.2	28.1	562	11.1	35.9	1
22.1	19.8	19.8	157	13	28.1	34.6	538	7.64	25	29.2
47.4	36.5	9.22	12.9	2.13	19.8	38.9	874	9.31	13.8	15.7
57.3	46.6	13.3	75.7	10	10.1	28.1	449	10.8	20	17.5
36.5	16.4	18.6	26.2	5.94	13.6	21.9	1762	15.1	37.5	11
34	12	33.4	255	35.9	17.6	32.8	644	7.64	46.6	15.7
36.8	13.3	14.6	24.8	9.73	70.4	118	1009	5.99	7.91	10.5
42.6	26.2	30	21.1	7.3	9.91	35.9	403	8.28	24.1	22.9
28.1	16.7	35.2	49.1	18.3	23.7	36.8	514	10.3	38.5	60.4
142	76.4	18.6	22.7	2.84	32.5	55.2	890	20.2	41	43.7
36.2	34	36.8	42.9	24.1	36.8	45.7	638	6.79	19.5	26.9
33.1	29.4	22.1	42.2	2.84	23.1	33.1	1055	9.65	47	42.2
215	109	13.9	42.9	4.18	29.4	60.4	3191	8.98	20.5	31.6
115	80.6	22.3	27.4	2.25	20.7	31.6	567	10.4	25.3	29.7
97.3	63.2	21.5	21.1	2.76	27.1	47	784	7.99	46.1	18.9
129	93.9	23.7	16	9.22	7.91	38.2	403	1.91	6.04	1.13
67.3	41.4	40.7	66.1	20.5	82	131	2017	10.8	16.3	27.6
46.6	29.2	17.5	58.3	14.9	19.8	37.9	947	5.83	17.6	25.7
58.3	40.7	16.5	150	12.5	14.9	35.2	914	3.85	13.9	28.4
52.8	43.3	30.8	21.9	2.71	37.9	56.7	1554	18.4	32.8	35.2
37.5	29.4	27.6	45.3	23.5	43.3	60.4	692	7.57	24.8	37.2
165	98.2	23.7	17.3	13.2	13.1	23.9	737	13.2	21.5	23.1
80.6	49.1	17.8	235	29.7	4.83	18.9	322	14.7	24.1	52.3
36.2	18.6	19.1	14.1	16	19.1	30.5	661	13.3	19.1	37.2
22.9	26.2	20	207	17.2	19.6	35.5	791	12.1	16.3	36.8
35.2	34.9	20.7	204	18.6	18.3	29.4	588	13.3	22.3	36.8
34.9	22.1	26.7	43.3	6.67	27.4	26.7	491	5.09	5.73	22.1
178	100	27.4	300	20.5	34.3	67.3	1794	8.66	8.51	16.4
50.5	30.2	19.3	11	6.1	17.3	28.9	632	23.7	63.8	59.9
64.9	51.9	17	135	16.7	15	23.9	764	7.57	17	26.9
54.7	37.2	20	16.1	9.73	35.2	53.8	552	14.5	31.1	5.14
30.5	21.7	21.5	95.6	4.33	16.7	28.1	947	6.55	22.9	20.4
51.4	32.8	32.8	23.9	21.1	13.6	23.7	843	9.56	21.7	21.9
69.2	40.3	20.2	62.6	19.5	2.15	7.37	21.3	14.6	42.2	38.2
36.8	22.7	28.1	23.1	4.78	20.7	32.8	433	42.2	104	95.6
47	37.2	12.6	35.2	3.08	12.1	24.1	673	2.29	23.7	17.5
37.2	29.2	35.5	29.7	19.6	56.7	82	1827	1.35	10.3	24.4
50.5	29.2	15	143	7.91	17.9	32.5	470	6.85	24.4	15.7
15.3	30.5	19.5	154	10.6	30	47.4	594	7.91	36.8	43.3
38.2	21.9	36.5	382	44.5	17	39.2	500	11.1	24.1	32.5
64.4	35.9	18.1	20.5	6.49	26.2	60.4	1640	20.4	42.6	42.2
172	95.6	15.5	40.7	11.1	3.28	12.3	737	8.2	21.5	18.9
35.5	28.1	17.8	20.5	11.2	50.9	89	890	6.15	7.23	14.9
40.3	21.5	51.4	223	31.6	15.8	41.4	610	6.15	20.2	20.9
22.9	19.3	13.9	16.7	7.77	111	172	2054	9.31	20.5	22.5
53.8	49.6	25.5	20.2	6.32	6.15	13	939	24.6	45.3	68.5
147	89	33.7	269	23.3	8.98	22.7	1000	11.1	20	34.9
95.6	64.9	30.8	198	38.2	63.2	127	2308	14.2	25.5	52.3
75.7	63.8	55.7	311	62.1	37.2	63.8	1685	13	26.2	38.2
79.1	52.3	12.9	138	12.1	172	453	4826	7.64	28.9	28.4
42.9	30.8	23.1	18.6	1.86	4.53	17.8	1065	5.78	19.1	12.3
157	93.9	16.5	16.4	1.68	18.4	35.9	649	8.9	26.7	21.1
223	153	10.7	87.4	6.04	38.2	69.2	2288	34.9	80.6	120
33.1	20.9	21.5	84.3	17.2	17.6	27.9	573	9.73	24.1	16.4
57.8	7.57	16.3	158	21.5	42.6	73.7	1009	5	12	17.6
233	286	46.6	302	47.8	12.2	17.5	679	9.82	22.3	73
52.3	45.3	10.4	83.5	6.98	14.2	31.3	931	7.23	26.4	42.2
43.7	27.6	25.9	22.3	3.59	30.8	44.1	594	17.9	54.2	94.7
36.2	19.3	21.3	16.4	1.53	28.9	40	890	6.32	30.5	17.6
54.7	42.2	20.2	16.5	4.91	45.7	78.4	3652	12.9	19.5	29.7
60.4	35.5	14.1	124	18.1	1	2.71	10.6	40.7	71	86.6
59.9	48.7	30.2	209	8.06	22.1	41	509	8.43	21.5	18.1
22.9	26.9	20.2	19.6	5.23	10.3	13.3	255	10.1	22.5	19.6
164	225	18.4	52.8	1.46	50	68.5	453	2.39	18.4	13.9
44.5	33.7	19.3	35.2	12	3.68	21.9	445	10.5	16.8	25.3
36.5	22.5	17.2	16.5	7.3	21.5	48.7	604	21.9	42.9	44.1
23.9	7.57	20.5	121	11.2	35.5	46.6	615	34	75.7	75
49.6	41.4	25.7	11.1	9.06	28.9	57.3	1762	5	27.1	33.1
143	74.3	24.4	51.4	14.7	50	82.8	2414	50.5	100	87.4
35.2	16.3	16.8	20	13.9	9.06	34	407	7.3	29.2	35.2
36.5	22.1	15.8	111	24.6	31.1	56.2	685	7.37	16.1	2.5
34.3	21.1	14.6	132	12.5	9.56	14.9	799	6.15	16.5	25.5
20	17.6	5.99	6.92	11.2	3.65	10.4	552	11	22.3	21.5
73	50	28.9	32.2	18.8	10.2	17.9	319	8.43	17	42.2
161	89	19.5	142	5.99	18.4	24.6	704	4.96	19.5	12.4
31.3	31.3	18.8	17.3	1.86	21.7	49.6	1433	14.1	29.2	30.2
27.1	28.4	16.1	20.5	19.1	14.7	25.9	626	1	46.1	3.08
205	137	19.1	17	8.28	26.9	59.4	956	7.7	16.1	28.6
47.4	38.5	24.6	31.3	1	57.3	93.9	1911	10.8	17.3	18.9
52.8	31.3	44.9	264	30.2	12.1	35.9	1263	13.9	27.9	21.7
164	87.4	22.1	26.4	1.96	12.1	13.9	533	12.5	31.9	25.7
55.7	29.4	33.1	626	41.4	11.2	23.7	784	9.31	15.7	36.2
40	44.1	63.8	346	71.7	12.7	29.2	578	16.7	41.4	53.3
85.8	71	19.1	28.1	10.4	31.9	57.3	1582	9.22	13.7	34.3
47.4	33.1	65.5	141	19.5	33.4	46.1	426	13.8	30.2	20.2
37.5	28.1	13.9	34	3.92	11.3	21.9	1155	9.31	20.7	24.1
26.7	15	9.82	154	7.04	25.7	39.6	325	14.7	29.7	52.8
37.9	29.4	27.4	24.1	1.33	15.4	31.1	547	7.64	9.56	20.7
29.4	22.5	45.7	328	21.5	94.7	170	2167	7.17	20.7	30.8
33.1	26.4	21.5	50.9	6.98	117	135	445	49.6	109	103
38.2	18.1	10	20.4	8.58	12.2	31.9	784	9.65	28.4	22.7
36.8	24.4	15.7	44.5	5.62	23.7	43.7	1018	109	281	355
41	31.9	20	105	16.8	34	67.9	1640	16	36.5	32.2
141	76.4	24.8	35.9	3.4	4.53	10.2	922	9.22	22.5	25.9
42.9	35.9	14.7	124	19.8	30.2	48.7	1104	2.97	13.2	18.4
66.7	30.2	1	14.3	7.17	40.7	64.4	449	1	6.21	3.92
28.1	12.4	24.8	22.5	6.1	14.6	40.7	514	8.35	20.9	24.1
21.3	22.3	53.3	337	67.9	7.37	8.51	334	6.79	15	13.5
28.6	22.5	10.6	19.1	19.8	60.4	147	2548	17.3	41.8	67.9
225	149	9.39	11.3	10.4	24.8	59.9	1640	1	13.1	17.3
143	161	26.9	16.1	11.7	8.43	25.9	799	23.3	47.8	39.6
32.5	27.6	20	56.7	5.47	30.5	45.7	1208	27.6	64.9	131
40.7	21.5	21.7	50.9	11.3	28.4	42.2	578	2	17.9	16
53.3	47.4	29.2	47.4	13	9.39	23.5	1094	1.06	119	6.92
85.8	46.1	58.3	355	62.1	13	27.9	466	32.8	99.1	59.9
51.9	37.5	53.3	198	71	9.22	18.1	533	19.3	29.4	54.7
67.3	72.3	10.5	119	5.19	23.3	41	632	47.4	131	264
30	30.5	2.62	3.28	1	5.09	12.7	710	8.13	15.3	13.3
24.1	18.3	17.9	97.3	7.1	63.2	112	1911	17.6	27.9	35.2
32.2	19.1	14.3	77	12.1	17.5	30.2	562	18.3	50	62.6
36.2	31.6	22.5	41	10.1	12.4	27.9	965	18.8	57.3	64.4
72.3	53.8	24.8	20.7	3.92	16.3	28.9	1298	50.9	84.3	89.8
34.9	25.7	20.4	81.3	2.97	21.5	50.5	1165	6.67	30.5	23.5
151	80.6	43.3	47	15.7	20	49.1	704	8.74	11.3	15
34	15.4	16.8	57.8	7.57	35.2	49.6	1762	9.31	28.6	27.1
104	82	12.3	1.19	21.9	17	23.3	523	14.1	26.4	27.1
88.2	35.9	20	131	11.4	34.6	55.2	1144	15.1	34.3	27.1
107	56.2	19.6	195	15.3	29.4	46.6	638	8.35	21.1	13.9
3.49	4.41	25.9	26.7	2.05	20	40.7	828	7.99	28.1	27.9
50.5	33.4	51.9	385	57.8	16.7	22.9	487	4.18	18.1	32.2
79.1	56.2	4.78	66.1	6.32	39.6	79.1	2503	25	62.1	72.3
51.4	27.4	65.5	418	59.4	24.6	41.8	799	13.9	33.7	31.1
48.3	33.4	25	28.6	6.1	3.92	8.9	158	3.28	12.7	19.3
77	50.5	18.9	150	10.7	29.2	49.1	874	8.58	200	7.23
41	27.6	20	16.1	1.31	13.7	42.9	610	36.8	77	121
50	25.3	16.7	80.6	8.43	22.1	36.8	583	7.57	10.6	23.1
57.3	35.5	62.6	437	49.1	4.53	15.1	806	47.4	59.4	14.3
34	16	12.1	289	22.7	17.8	20.7	505	13.3	29.7	32.5
31.9	23.5	25.3	23.5	3.31	10.7	24.6	851	11.9	22.7	7.37
39.6	28.1	18.1	28.9	20.9	19.1	29.7	557	18.6	65.5	73
88.2	63.8	78.4	337	51.4	28.4	44.5	828	17.9	52.3	55.2
65.5	42.9	23.3	22.5	12.6	13.5	19.1	441	6.1	23.3	34.3
108	71.7	16.8	183	23.9	16.1	30	400	13.6	21.5	44.1
27.9	26.2	14.1	292	25.5	13.9	38.5	730	5.73	23.3	26.7
114	69.8	12.2	211	10.3	63.8	98.2	1655	11.2	24.4	30
48.7	28.9	32.2	31.3	17	32.8	57.8	1298	19.1	49.6	54.7
41	18.1	14.6	22.1	1	24.4	38.9	594	9.56	17.9	7.3
34.9	19.6	20.2	13.1	1	55.2	115	1843	7.04	25.3	36.2
17.5	11.5	29.2	18.8	5.94	27.6	48.7	757	27.6	64.4	65.5
67.9	71.7	18.1	14.2	9.14	39.2	47.8	939	15	34.9	54.2
170	105	18.1	55.2	5.73	49.1	73	828	10.3	20.2	44.5
31.9	25.5	29.7	24.8	2.64	1	10.2	38.9	8.28	12	33.4
31.9	22.7	12.6	215	18.9	18.8	37.9	685	2.46	58.3	6.79
29.2	22.9	20.9	74.3	4.03	12	28.1	414	5.78	16.8	13.8
37.5	22.5	16.8	151	12.2	113	227	2642	8.98	14.9	4.33
81.3	61	13.6	64.9	11.1	17.9	58.8	500	15.5	25.5	28.6
77.7	55.2	18.3	127	11.9	55.2	84.3	1055	46.1	93.9	105
27.6	18.9	21.1	75	18.9	16.1	29.2	1165	29.4	65.5	81.3
75.7	37.9	10.2	8.98	7.7	10.2	28.1	461	22.9	42.9	64.4
47.8	30.8	26.2	37.9	5.99	7.5	7.04	414	35.9	82.8	160
178	108	54.2	274	29.7	41	71	1928	8.06	19.1	28.6
73	43.7	26.2	343	42.2	49.6	80.6	1124	18.4	43.3	66.1
34.3	21.3	4.29	13.5	9.31	9.82	25.7	649	1	64.4	4.33
49.1	11.9	63.8	445	66.1	30.5	50.9	437	9.73	15.4	15.4
50.9	36.8	21.7	274	20.2	12.3	21.5	491	10.9	33.4	45.3
36.5	20.9	20.7	68.5	24.4	77	110	372	9.73	14.9	26.4
73.7	16.8	32.5	24.1	1	34.3	55.2	567	9.56	22.3	20.5
42.6	28.6	18.6	37.9	13.5	9.65	24.6	359	5.23	18.3	13.6
91.4	55.2	18.3	196	10.6	33.7	50.9	655	10.6	27.4	43.3
139	94.7	20.9	73.7	10.2	27.9	48.3	1197	15.7	36.2	46.1
62.1	41	27.4	22.5	1.79	8.43	20.7	528	12	23.9	12.6
63.8	41	22.3	14.9	1.09	30.5	64.9	1843	13.3	34	25.3
89.8	82	12.5	27.4	10.1	17.3	31.1	882	16.5	47	68.5
26.9	23.9	13.8	64.9	10.9	26.4	42.9	461	6.55	25.7	32.8
112	69.2	23.3	45.7	10.8	28.6	59.9	1346	3.08	8.51	7.84
69.2	36.8	26.9	19.3	7.37	17.9	33.4	1000	11.8	16.7	25.9
28.9	18.3	44.1	433	67.3	21.1	29.7	449	11	36.2	42.6
28.1	13	7.99	145	16.3	17	34.3	649	11.8	30.2	52.8
23.3	13.1	82	239	26.2	30.8	50.5	956	16.8	26.9	18.6
181	97.3	22.5	105	12.9	1	6.67	1	8.58	20.9	11.3
136	87.4	14.1	161	21.9	22.5	43.3	2996	10.9	25.3	27.9
48.3	21.5	21.5	21.1	9.14	6.61	22.9	573	35.2	71	147
52.3	28.1	17.2	253	31.9	42.6	73.7	723	4.14	37.5	16
31.3	18.8	54.2	300	42.2	32.5	58.3	1946	1.91	5.38	15.7
44.1	18.4	23.5	22.7	6.61	22.9	36.8	496	16	34	14.5
44.1	42.2	14.5	204	13.8	20.7	42.6	509	13.3	39.2	61.5
31.9	16.5	12.9	146	28.1	60.4	106	1778	49.1	137	205
37.5	25.3	21.3	40.3	10.6	13	54.7	362	31.6	66.1	71.7
115	98.2	20.5	15.4	10.4	23.5	63.8	3652	11.8	22.5	18.4
27.9	27.4	32.2	274	34.6	19.3	29.7	213	2.5	110	8.74
34.3	19.5	22.5	205	17.8	16.4	29.7	528	21.7	41.4	10.4
118	77.7	16.5	112	21.7	7.04	3.72	764	12.4	20.9	36.2
33.4	13.3	34	41	10.8	10.7	28.6	866	10.9	25.9	20
21.5	36.2	35.9	141	29.4	36.2	64.4	3460	11.5	30.5	43.3
74.3	41.8	48.7	253	29.2	21.5	46.6	649	6.85	18.4	45.3
37.2	18.9	22.1	11.1	8.82	16.8	104	2227	18.8	68.5	61.5
28.6	31.6	40.7	433	56.7	3.43	12.4	898	5.73	28.4	13.7
41.8	25.7	20.9	14.1	5.38	12.9	35.2	362	13.1	21.7	21.5
274	196	22.3	43.7	8.35	6.73	23.1	1104	8.98	25.7	17.2
27.6	25.5	19.8	36.8	5.42	12.6	20.5	562	12.4	46.6	52.3
121	79.9	29.7	23.9	14.5	25.7	32.5	673	9.65	15.4	33.1
237	170	70.4	241	41.4	37.5	53.8	322	9.22	15.8	15.8
48.3	23.9	18.8	42.6	6.55	40.3	50.5	453	20.4	33.1	52.8
163	114	24.4	24.4	14.3	49.1	71.7	599	49.6	96.5	105
241	151	19.8	15.8	7.77	14.1	26.7	615	10.1	37.5	42.9
74.3	58.8	12.7	150	8.13	11.4	22.7	552	8.9	21.7	18.4
60.4	40.7	44.9	239	40.3	5.33	17.2	743	8.98	17.2	37.2
32.2	16.7	33.1	311	45.7	37.5	63.2	698	12.5	36.2	56.7
51.9	37.5	18.3	24.4	5.14	18.6	20.5	319	6.26	11.4	35.9
133	80.6	28.4	36.8	6.61	37.9	51.9	343	111	331	355
34.3	17.2	41.8	274	24.6	23.3	35.5	542	12.2	32.5	26.7
39.6	30	29.2	241	35.9	7.99	25.7	457	2.48	20.7	14.5
34.3	17.5	25.3	18.9	13.6	18.8	34	704	8.66	21.9	13.1
31.3	34.3	17.9	17.6	12.9	2.05	8.35	385	50.9	117	151
79.9	49.6	35.2	39.2	9.31	14.6	20.7	533	4.7	14.5	18.1
122	143	27.4	33.4	6.85	21.9	31.3	547	8.82	25	23.1
37.9	20.5	19.8	67.9	15.4	73	124	2393	8.13	11.7	20.4
118	64.4	19.1	138	15.4	28.9	28.9	655	12.5	29.7	24.8
38.9	14.5	15.8	60.4	37.9	26.4	45.7	777	10.8	15.3	16.1
92.2	41.8	26.4	27.4	5.67	9.31	36.8	429	52.8	125	223
33.1	14.6	31.1	12.2	9.06	7.7	13.7	255	16	24.4	37.5
35.5	27.6	14.9	130	18.8	11.8	16.5	500	7.23	19.5	17.3
59.4	30.8	5.94	29.4	9.22	101	161	1778	13.1	22.1	28.1
78.4	51.9	22.9	23.7	10.4	5.38	9.73	583	6.67	14.2	15.4
146	86.6	1	100	19.3	14.1	27.4	487	14.9	33.4	42.2
26.9	14.2	15.3	45.3	10	16.3	28.4	644	27.4	56.2	79.9
31.3	19.6	17.2	85.8	11.7	29.2	59.4	914	9.91	25	14.5
30.8	24.8	21.1	91.4	19.6	15	41.4	519	33.7	84.3	81.3
99.1	97.3	24.1	20.2	8.98	35.5	58.3	2350	7.43	24.4	18.6
30.8	22.5	11	62.6	6.04	34.6	60.4	1472	10.6	27.6	39.6
27.9	15	19.5	23.3	14.2	18.8	41	1241	4.22	8.2	15.4
36.8	31.3	67.9	286	54.7	48.7	61	382	22.3	60.4	73
109	83.5	59.4	305	49.6	35.9	67.9	3786	21.9	47.8	42.9
44.5	28.1	7.57	146	19.6	15.5	29.4	567	5.28	26.7	17.5
37.9	20.2	41.4	42.6	14.6	11.4	27.6	429	32.2	85.1	112
53.3	38.2	25.3	107	13.2	8.28	14.3	264	12.3	24.1	32.5
163	92.2	20.5	32.5	6.92	23.3	33.7	349	1.98	85.8	7.37
33.4	27.1	16.3	142	9.22	106	191	2129	10	21.5	23.9
34.3	13.2	21.1	24.8	12.2	25.7	51.9	519	10.4	23.1	30
18.6	5.42	20.2	22.5	4.49	40.7	62.6	692	27.4	52.8	61
37.2	23.1	7.64	22.5	13.2	79.1	147	1894	7.37	25.9	27.1
26.7	15.7	28.1	334	48.3	14.1	21.1	906	5.88	28.4	21.9
142	98.2	59.4	392	44.5	71.7	123	1762	34.3	118	137
52.3	34	26.9	24.1	5.73	37.9	58.8	1459	6.98	22.1	27.6
31.9	16.8	32.2	46.6	15.7	10.9	27.4	890	18.3	25.9	58.8
106	68.5	12.4	175	16.8	12.3	40.3	685	8.74	28.4	9.91
42.6	21.3	20.9	131	12.1	12.7	31.6	487	8.51	18.9	20.7
34.9	16.4	17.8	18.8	2.15	34.6	59.4	445	53.8	78.4	20.2
31.9	26.4	14.1	20.2	4.61	12.4	18.9	799	7.17	19.3	22.3
36.5	20.7	29.4	36.5	21.3	2.07	9.91	26.7	30.5	50.5	9.65
27.6	15.5	27.1	35.9	10.6	63.2	95.6	1197	13.6	17.9	21.9
26.2	20.9	22.7	10.1	7.43	15.4	37.2	433	10.8	14.5	8.28
16.1	25	18.1	34.6	4.49	3.52	13.6	704	11.5	26.9	37.5
34.9	16.1	54.2	562	71.7	13	27.6	737	9.73	18.4	18.9
153	82	33.4	48.7	8.28	11.9	28.6	710	16.1	47	36.5
129	161	54.2	79.1	23.5	34.9	70.4	2788	6.55	7.64	34
33.4	17.5	23.9	16.5	1	7.91	21.5	578	7.5	30.2	24.1
31.9	33.4	64.9	474	77	40.3	46.6	1176	9.22	15.5	12.6
25.9	16.7	14.7	217	36.8	87.4	151	2839	3.49	51.4	2.21
98.2	67.9	11.1	79.1	6.04	9.56	21.3	470	51.4	93.1	178
55.2	31.3	53.3	253	50.9	13.2	25.5	1176	12.2	26.2	30.8
25.9	20.2	10.4	179	17.8	15.3	36.8	1155	4.14	14.2	7.99
45.3	31.1	23.1	30	12.1	8.35	24.6	573	9.91	18.9	20.7
53.8	31.6	29.7	40	14.5	57.3	89	1894	13.8	35.2	39.6
43.7	34.6	24.8	14.7	5.88	28.9	67.3	1275	22.5	42.6	63.8
196	113	14.2	92.2	2.41	11.7	15	638	7.57	22.1	25.9
30.8	20.7	28.4	30	12.7	13.6	16.5	509	10.6	24.8	18.3
21.3	23.5	18.3	85.1	7.37	22.5	37.5	466	28.9	56.7	63.8
34.6	17.8	25.7	30.5	4.53	16.3	31.6	615	8.51	12.9	16.8
30.2	17.3	61.5	122	72.3	9.56	26.4	583	7.5	22.9	13.8
30.2	25.3	56.2	573	75	10.6	23.7	449	13.2	31.1	38.9
30.2	11.8	21.5	25.5	11.5	6.73	19.3	204	5.47	13.2	23.7
132	95.6	19.1	23.7	11.2	35.5	53.3	1144	25.3	60.4	123
49.6	39.6	37.5	53.8	13.9	7.77	22.1	57.3	21.9	49.6	70.4
33.4	16	23.1	32.2	8.51	29.7	40	557	13.3	9.06	10
47	47.8	15.8	117	14.7	24.4	36.2	1000	10.5	37.9	94.7
72.3	25.7	13	3.16	7.91	37.9	115	982	17	37.9	41.8
139	91.4	19.5	70.4	7.23	13	22.5	414	7.04	20.5	2.55
33.4	22.7	16.5	18.3	11.5	29.2	54.2	433	16.3	41.8	75
92.2	79.9	108	221	1084	121	205	2503	10.5	16	25.5
32.5	23.7	28.1	28.1	22.5	31.3	44.9	610	18.4	53.3	115
35.2	18.6	20.7	24.1	4.07	12.9	26.4	538	9.31	27.6	60.4
138	105	2.48	15.3	9.47	1.24	5.23	62.1	8.51	37.5	26.2
37.5	23.1	13.3	292	7.3	9.39	38.2	1731	9.39	17.3	25.7
37.9	8.66	17.3	33.4	7.91	20.2	45.7	2267	8.28	22.7	14.5
75	50.9	16.4	29.7	9.14	61	108	1395	7.3	17.3	40.3
38.2	26.2	30	27.6	6.49	20.2	24.8	509	17.2	35.2	17.8
26.7	18.6	48.7	44.1	3.79	14.1	16.3	791	7.99	20.9	21.9
30.5	22.9	22.1	27.1	6.44	59.9	113	1554	2.39	82	2.02
59.9	47	18.8	193	32.2	10.5	25.9	667	13.5	32.8	49.1
37.9	22.7	35.9	274	33.1	2.94	16.4	649	21.5	48.3	41.8
36.2	17.5	47.8	160	20.9	59.4	101	1395	11.7	20.9	20.5
43.3	27.1	33.4	30.2	11.9	9.73	20.7	215	3.05	20.9	1
45.7	25.5	15.8	189	8.28	52.3	84.3	1420	11.3	42.9	36.2
31.6	27.9	18.6	57.8	13.1	7.37	10.5	276	6.49	16.1	35.2
200	95.6	8.58	16.4	3.62	36.5	67.9	991	9.91	22.9	11.7
34.9	15.5	23.7	79.9	16.1	36.2	57.8	1144	5.47	19.6	26.7
178	99.1	14.7	24.1	10.2	14.2	15.1	567	106	151	30
94.7	38.2	16.1	211	32.2	16	28.9	538	9.39	19.6	9.91
24.4	18.4	15.7	18.3	3.37	12.9	33.1	750	8.28	15.3	12.3
55.2	55.2	8.43	146	21.5	13.6	27.9	649	7.17	21.7	23.3
50.9	47.4	20.4	24.6	2.02	10.2	28.1	982	15.8	51.4	77
54.2	34.3	12	139	19.6	12.3	18.8	621	6.26	18.8	37.9
41	26.9	20	17.3	7.77	25	36.5	649	11.7	15.1	18.8
27.1	27.1	17.9	17.5	6.38	6.21	22.1	372	11.2	25.3	47.4
36.5	25.3	26.9	255	20.4	73	154	3106	10.1	38.5	41
26.9	18.4	47.8	223	48.3	19.8	41.4	1298	10.9	31.6	31.9
112	80.6	22.7	25.9	10.3	12.6	30.2	474	4.14	16.8	16.4
30	17.6	20.5	24.1	1.07	93.1	176	3368	10.2	24.8	51.4
28.9	20.9	27.6	34.9	10.7	21.7	44.1	1075	6.85	10.9	32.8
35.9	22.3	15.4	157	20.7	1.26	23.3	17.3	6.38	18.8	20.7
207	139	11.8	142	19.8	16.8	34.6	562	9.82	18.8	33.7
30	33.1	11.8	38.5	14.7	6.79	18.3	1165	7.5	10	15.1
28.9	15.3	41.4	142	35.5	16.1	34.6	478	3.79	24.1	24.1
44.9	24.6	20.4	21.5	24.8	6.32	22.1	770	23.5	42.6	75
15	7.04	18.9	237	23.3	244	474	5523	14.3	27.6	58.3
41.8	23.1	19.3	158	15	30.5	46.6	483	9.91	24.1	28.9
31.1	20	12.1	157	15.8	94.7	136	1046	10.5	33.7	51.4
26.4	21.1	16.8	57.3	8.82	37.5	58.8	523	4.87	34.3	25.9
69.2	37.9	19.8	17	1.27	28.1	48.3	644	8.51	29.7	26.2
54.7	36.5	7.04	8.9	5.47	6.32	4.57	150	7.17	22.3	6.55
25.9	13.3	89.8	422	73	30.2	44.9	661	10.3	27.6	41.4
31.9	16.4	67.3	176	23.9	56.7	97.3	1263	13.2	14.3	26.7
49.1	43.3	31.1	32.8	17.8	19.6	42.2	599	4.07	16.7	24.4
28.4	20.2	9.14	165	12.5	13.7	27.9	403	10.6	20.4	23.5
42.6	33.1	28.9	24.6	10.6	12.2	20.2	505	5.94	15.5	4.07
29.4	25.5	12.2	75.7	12	18.9	42.2	2207	11.8	28.1	22.3
34.3	17.6	19.6	20.7	14.1	30.2	41	313	9.14	19.5	14.9
33.4	28.6	11.4	189	14.2	15.5	29.4	542	8.51	14.3	27.6
69.2	54.2	19.5	16.3	11.1	11.4	24.8	573	11.3	27.1	59.4
132	84.3	23.1	20.9	3.25	21.5	34	362	7.37	27.9	36.8
1.14	2.11	23.5	19.5	1	24.1	46.6	973	71	184	207
25.9	13.2	21.9	24.1	21.3	59.9	92.2	1370	7.77	20.7	26.9
33.1	22.3	47.4	141	39.2	27.1	50.5	1000	1	75	7.7
122	75.7	20.5	42.2	6.49	49.1	120	1322	9.14	16	22.3
78.4	56.2	5.38	146	8.82	10.8	26.2	418	21.3	49.6	64.9
63.2	50.9	58.8	389	59.4	21.7	33.7	858	13.6	24.1	13.7
39.6	20.4	14.1	101	11.8	13	22.9	514	6.61	16	33.7
204	138	17.5	191	25.5	5.52	14.6	914	4.03	18.8	30.2
22.5	17	16.7	82	18.8	37.2	61.5	1186	10.7	22.7	28.6
40.3	21.7	27.1	297	26.7	40	62.1	1055	9.91	22.7	35.9
235	135	53.3	359	53.8	11.9	24.8	673	24.1	61.5	79.1
24.1	13	72.3	337	85.8	1.01	2.44	158	6.21	15.3	17.2
22.5	21.1	23.3	61	7.64	103	255	3752	12.5	25.9	22.3
108	106	38.9	255	55.2	55.7	87.4	1395	9.06	39.2	26.7
53.3	38.2	30	36.5	8.82	13.9	23.3	583	5.62	20	23.1
132	59.9	36.2	160	44.9	8.66	36.5	359	9.39	27.4	17.9
94.7	64.4	16.3	16.8	9.22	67.3	105	1981	10.3	22.5	20.5
151	98.2	23.1	36.8	1.41	41.8	93.9	1554	10	17.5	1.17
112	81.3	18.9	37.9	12.9	9.65	26.4	1395	5.33	15.1	28.1
120	77.7	40	62.1	28.4	22.9	36.8	414	12.3	13.7	17.5
39.2	34.9	75.7	433	73	11.7	39.2	449	25.5	51.4	75.7
164	119	13.6	89	11.5	21.5	40	382	6.73	18.8	17.8
29.7	16.7	85.1	274	41.8	15	25.5	523	11.9	29.2	63.8
44.9	48.3	27.9	30.8	19.5	64.4	146	2091	11.1	27.6	23.5
20.5	30.2	23.1	20.4	3.79	20	73	562	30.2	63.8	151
172	90.6	22.7	16.3	7.1	70.4	89.8	403	4.14	22.7	36.2
28.1	24.4	14.9	67.9	1.54	10.4	13.5	649	37.5	55.2	14.6
46.1	20.2	18.1	81.3	8.82	18.3	39.2	567	11.4	15.7	32.5
147	102	6.04	20.4	10.3	29.2	47.4	478	5.47	14.6	11.4
32.8	28.1	17.3	20.9	3.82	100	172	2666	31.9	75.7	107
9.39	18.1	14.2	17.6	8.13	11.2	21.1	457	115	184	27.6
34.9	30	40.3	389	33.7	29.2	81.3	2247	8.35	12.6	19.1
73.7	57.8	8.9	122	6.04	45.7	58.8	578	22.1	66.7	62.1
56.2	44.5	18.1	20.7	5.62	10.7	31.9	403	11	30.5	53.8
101	64.4	23.1	98.2	15.3	19.3	38.2	685	16.8	27.4	28.9
77.7	43.7	17.2	21.5	5.09	12.4	23.1	947	8.28	20	15.3
65.5	40.7	17.5	23.3	10	7.43	19.3	1000	2.25	64.4	1.12
28.6	17.9	15	51.9	14.9	9.22	34.6	470	7.99	12.5	19.1
63.2	28.6	60.4	161	36.5	63.8	98.2	890	13.7	22.3	21.9
45.7	10.6	18.1	105	14.1	106	181	2167	14.6	29.4	22.1
50.5	35.9	62.1	308	41.8	15	25.7	552	8.35	18.4	13
13.8	18.3	13.5	54.2	21.9	18.4	39.6	655	8.43	30.5	34.3
22.1	14.3	71	215	55.2	16.8	30.2	491	6.61	16.4	29.2
40	18.3	22.3	29.2	11.1	50	101	2690	1	86.6	4.07
38.2	13.7	15.8	47.4	4.96	11.9	28.9	470	45.3	89.8	114
23.9	13.3	52.3	88.2	30.2	4.83	16.4	743	16.8	32.8	83.5
90.6	57.8	28.9	23.3	1.93	16	35.9	396	42.2	95.6	100
30.8	21.3	15.4	111	20.4	12.5	34.3	466	24.1	48.7	110
36.2	17.3	15.5	136	18.1	18.4	31.3	505	41.4	78.4	121
34	19.8	34	196	13.7	6.85	19.5	820	10.3	23.1	27.1
104	105	27.1	379	65.5	15	26.4	638	12.5	19.6	15.8
96.5	53.3	22.1	22.9	7.64	31.9	43.3	355	7.64	19.3	18.1
82	61	8.43	89.8	7.43	12.2	18.4	615	13.1	46.6	43.3
33.1	20.7	19.5	73.7	12	17.6	38.2	389	10.7	14.2	21.3
37.9	21.1	25.7	24.6	5.88	30.2	51.4	947	6.55	41	32.2
36.5	14.5	53.8	414	72.3	13.2	31.1	1084	11.8	50	41.8
31.9	24.6	31.6	38.5	6.26	73	130	2110	8.35	15.7	17.5
41.8	32.8	13.8	139	17.9	8.51	18.9	269	1.21	5.19	1
42.2	32.5	69.8	105	44.9	35.9	85.1	2129	9.39	30.2	19.1
37.5	23.3	16.1	151	16.1	41	69.8	1275	36.8	83.5	172
18.6	17.3	96.5	491	109	11.9	32.8	346	18.6	41.8	89.8
9.22	1.01	19.1	21.5	9.91	17.9	43.7	573	11	33.7	50.9
35.9	20.7	45.7	284	31.9	13.9	34.9	478	3.4	4.18	33.1
109	77.7	31.1	32.5	13.5	14.2	23.3	445	55.7	108	80.6
16.4	10.5	20.9	14.9	18.4	12	44.1	474	37.2	101	114
25.7	14.6	12.5	96.5	20.4	52.8	86.6	777	18.8	48.7	34.6
32.8	12.9	14.7	106	14.5	15.3	30.8	615	1	84.3	7.99
23.9	16.5	24.4	14.2	3.25	10.8	50	649	10	24.1	19.3
43.7	21.1	33.4	34.3	8.28	10.2	30.5	632	14.3	29.4	4.37
34	34.3	33.7	372	29.4	40.7	59.9	1420	39.2	99.1	129
34.3	21.3	51.9	292	56.2	10.2	30.2	449	5.23	23.7	34.6
115	58.8	20.2	57.3	15.3	67.3	115	1370	15.4	36.2	39.6
150	97.3	1	77	7.77	63.2	99.1	1499	10.6	41.8	44.1
38.9	22.5	20.9	22.1	6.32	6.44	12	496	11.3	17.3	40.3
28.1	19.6	17.2	184	7.1	23.7	31.9	379	62.1	189	237
32.8	22.9	19.5	21.7	13.1	20.7	50.5	737	9.91	22.7	22.1
17.9	36.5	38.9	44.5	33.1	44.5	63.8	422	10.6	23.5	3.65
22.7	26.2	17.6	63.8	9.91	35.9	66.7	1094	5.73	13.2	35.2
22.9	34.3	18.1	22.9	8.74	2.17	10.6	99.1	1.04	1	3.82
35.2	22.3	17.2	155	19.6	28.4	53.8	835	10.7	41.4	19.3
29.7	25.5	37.9	57.8	14.6	11.2	21.1	470	7.43	22.5	23.5
202	142	14.7	78.4	1.88	21.1	105	1298	7.17	23.3	25.5
27.1	33.1	20	8.58	8.06	75.7	106	346	12	16	16.4
31.1	22.7	14.1	90.6	13.2	33.1	61	1420	15.4	36.2	59.9
17.5	19.3	118	365	77	10.4	30.5	1843	5.88	20.9	17.6
37.9	19.6	28.1	142	17.6	9.39	24.6	457	9.82	25.9	14.5
170	103	4.41	79.1	10.8	43.7	90.6	1540	4.33	7.7	8.58
70.4	42.2	19.8	13.7	8.98	12.7	37.5	437	1.83	7.23	7.57
33.7	22.1	34	219	17.2	82.8	135	2054	7.77	28.6	26.4
23.3	21.7	23.9	26.7	7.77	30.8	43.3	385	16.5	44.5	62.1
32.5	40.3	47.4	239	42.9	53.3	74.3	437	7.3	18.1	34.9
167	99.1	23.7	33.1	16.3	9.39	19.5	449	10.3	32.5	47.4
143	101	16.5	50.5	3.79	12.6	22.5	466	3.85	26.4	15.5
48.3	42.9	14.2	279	18.9	54.2	102	2167	1.65	61.5	9.65
37.9	23.1	7.5	13.7	5.52	18.3	19.6	820	10	15.8	16
49.1	29.2	27.1	138	16.5	10.6	15.7	514	13	36.8	53.8
55.2	40	12.6	115	13.9	33.7	49.1	396	3.02	37.5	3
28.9	4.03	14.7	104	26.2	22.1	29.7	311	9.82	18.8	32.8
61.5	41.8	21.7	20.2	3.16	14.2	25.7	594	10.3	17.6	23.5
32.2	23.7	64.9	426	71	5.28	23.9	274	9.91	35.2	29.4
62.1	31.9	23.5	20.4	17.5	22.1	27.9	414	27.9	58.8	72.3
71.7	42.9	28.4	292	41.8	19.8	24.1	259	6.32	36.8	28.6
49.6	40	30	195	35.2	3.72	22.7	219	29.2	69.8	103
25	15.5	15.8	12.7	6.98	28.4	39.2	410	7.3	14.1	18.9
37.5	18.1	26.7	655	78.4	17.2	31.9	505	13.7	32.5	38.5
163	122	21.7	311	47	43.7	99.1	1894	3.65	21.3	26.2
25.3	23.3	14.3	18.9	11.5	10.9	36.2	389	18.1	35.2	7.5
30.8	22.7	39.2	528	35.2	6.92	20.4	533	10.4	21.5	23.7
79.9	77.7	46.6	389	75.7	26.7	30.2	286	5.05	13.5	26.9
70.4	52.8	19.1	15.3	3.96	23.1	36.2	372	14.6	38.2	63.2
20	23.5	4.26	10.6	10.3	10.7	17.3	470	51.4	136	160
191	138	30.2	23.3	7.99	10.5	28.4	396	25	63.8	69.2
106	58.8	14.6	18.3	3.65	11.5	21.7	661	7.1	18.1	30.2
76.4	70.4	16.5	124	15.5	10.2	37.2	685	18.8	18.4	7.04
69.2	49.6	22.7	26.7	11.7	5.94	11.8	947	15.5	41	33.4
41.8	44.1	38.2	79.1	30	22.1	44.5	538	6.32	24.8	37.5
26.7	26.2	26.2	213	36.5	52.3	73.7	453	11.4	24.4	13.5
28.9	7.37	50.5	255	67.9	17.3	31.3	410	17.9	36.5	47.4
48.7	20.5	15.1	97.3	8.43	33.1	53.3	445	11.1	30.5	29.2
112	79.1	23.9	30.8	6.04	4.7	19.3	956	8.82	21.9	34
33.7	17.5	4.74	14.1	9.39	14.2	25.3	583	44.1	112	132
131	77.7	6.67	129	36.2	20.4	35.9	519	16.5	51.4	75.7
30.2	17.6	26.7	26.4	4.29	106	204	1794	30	59.9	66.7
139	82.8	16.1	36.5	19.1	24.8	35.5	349	3.25	76.4	6.61
36.5	15.8	25	23.3	1.38	30.2	62.1	505	2.55	5.09	1.72
46.1	51.4	16.7	16	1	5.19	10.5	866	1	68.5	9.22
36.8	22.5	15.7	239	27.4	22.1	34.6	449	9.65	31.1	20.9
28.1	16.1	16.8	22.9	11.2	36.2	66.1	1582	3.82	21.9	38.2
29.7	25	70.4	65.5	3.02	71	115	1827	10.6	24.6	23.3
41.4	18.6	17	113	33.1	35.5	62.6	1582	7.64	26.7	6.44
125	97.3	11.5	17	4.29	8.66	36.5	385	8.9	17.2	26.7
37.9	22.5	19.1	21.3	3.4	34.3	50.9	519	30.5	76.4	90.6
29.7	13.9	31.9	48.7	20.5	7.64	23.5	181	24.1	69.2	63.2
89	54.7	22.7	21.9	5.73	5.67	24.6	250	10.5	22.3	25.7
43.7	13	82	368	78.4	6.04	17	491	6.92	33.1	19.5
33.4	19.5	12.3	105	12.1	42.6	65.5	1395	14.3	31.3	49.1
61.5	31.9	4.57	14.2	1.95	32.5	48.3	244	13.9	31.3	23.1
38.2	25.9	24.1	20.9	6.98	22.9	43.3	271	7.1	12.1	23.7
33.7	18.4	10.2	12.1	12.1	6.26	13.9	389	52.8	73	2.69
55.7	25.3	24.1	20.9	3.68	28.4	39.2	410	17.5	34.9	5.57
48.7	27.4	42.9	215	25.5	74.3	121	1540	8.82	12.5	15.3
20.4	14.5	37.2	30.8	12.9	21.1	34.6	328	10.5	14.6	16.7
36.2	17.9	19.1	70.4	9.47	5.99	21.5	93.1	16.5	15.1	29.4
14.7	13.8	26.2	31.9	6.04	62.1	111	1877	6.44	20.9	8.98
145	143	10.6	281	15.4	7.99	17.8	626	13.2	26.2	17.6
115	75	22.5	25.9	1.79	15.3	61	349	4.14	17.3	25.7
85.1	48.3	21.5	19.1	1.06	8.13	5.94	311	6.21	12.6	15.8
36.8	12.4	17.8	20	9.06	7.43	16.3	982	10.1	26.9	33.1
48.7	24.4	112	414	125	10	17.6	638	7.91	22.7	19.8
40.3	18.8	10.3	145	21.3	19.5	30.8	599	6.21	22.3	27.6
18.3	17	38.5	269	24.4	5.42	19.6	253	7.84	27.9	22.3
39.2	27.1	12.1	147	8.43	1	2.57	89	9.22	16.4	48.7
38.9	22.5	42.2	403	55.2	14.1	35.9	487	12.5	39.2	59.4
10	5.88	17.2	172	15.7	19.6	32.8	578	8.43	16.7	20.9
49.1	26.7	22.7	81.3	12	49.1	101	2227	9.39	22.9	20.4
60.4	47	38.2	43.3	6.38	13.5	22.5	407	11.3	27.9	20
51.9	32.2	13.2	137	25.9	29.7	43.3	355	11.7	51.4	40.3
40	23.1	21.9	20.4	4.66	26.7	58.8	1946	6.21	22.9	24.4
30.2	17	46.6	289	56.7	61.5	113	1670	17.8	17.6	25.9
34.9	20.5	26.4	16.3	1	20	39.6	414	6.61	17	25.9
35.2	21.7	10.8	132	10.3	4.07	12.9	547	56.7	115	154
49.1	28.1	6.15	14.3	20.4	11.1	35.2	466	6.67	25.9	37.9
73	31.9	20	22.1	1	11.5	22.7	791	16.3	34.9	34.9
44.5	27.1	57.8	279	42.6	85.8	145	1640	8.98	26.7	21.1
35.2	13.8	18.1	17	12	6.38	15.7	422	12.5	26.4	25.9
86.6	57.8	6.67	27.9	20	28.9	56.7	2503	12.2	18.8	23.9
35.9	18.6	20.9	62.1	12.7	124	449	4958	8.28	24.6	6.21
40.7	31.3	12.7	127	13.8	16.7	26.9	382	33.7	70.4	67.9
138	97.3	14.7	133	15.8	23.7	43.7	562	8.28	22.3	36.5
26.4	10.2	31.1	29.2	6.26	31.3	42.6	523	4.14	69.8	1.53
151	85.8	19.3	95.6	11.9	5.73	14.5	250	20.9	60.4	88.2
158	109	44.1	73.7	12.3	18.9	37.2	679	9.22	28.9	26.7
35.2	20.9	67.9	365	71.7	28.4	42.9	368	4.03	55.2	3.13
113	122	19.6	23.3	8.66	11	31.3	267	7.23	20	26.9
44.1	20	34.9	43.3	21.7	54.2	153	1459	9.47	17.8	44.9
30.5	25.5	13.7	98.2	10.9	8.43	26.4	250	14.9	18.8	11.5
118	31.6	22.3	248	20.9	3.13	13.5	583	30.5	85.8	204
113	106	8.13	89	10.6	15.8	25.5	947	26.4	56.7	78.4
68.5	54.2	20.2	44.5	9.65	13.2	47.4	289	8.9	32.5	52.8
26.9	20	23.1	131	14.7	30.2	106	858	10.1	23.1	35.2
33.7	22.7	12.5	158	7.84	96.5	141	1843	10.1	15	28.6
54.7	29.2	17.9	51.9	23.1	23.9	40.3	730	10	22.9	20
40.7	24.6	8.9	78.4	7.57	59.4	108	2813	12.5	15.4	30.8
188	125	29.7	239	51.4	15.8	46.1	750	10.3	26.2	23.7
63.8	40.3	29.4	66.1	19.3	58.3	89.8	1027	58.8	165	259
30	10.4	23.3	22.9	4.41	39.2	88.2	2072	31.3	75.7	89.8
31.9	18.6	15.1	17.9	1	14.1	13.5	429	9.14	27.6	31.1
26.2	2	19.3	49.1	12.7	4.33	13.9	170	8.74	31.6	12.3
33.4	21.5	15.8	22.5	4.49	35.9	53.3	528	6.15	25.5	42.2
241	200	9.82	143	24.1	35.9	76.4	1811	36.2	73.7	81.3
18.1	26.9	10.1	77.7	17.3	34.6	89	1346	7.04	18.4	16.5
38.9	25.5	26.9	16.8	8.58	17.5	32.2	496	11.9	33.7	48.7
33.7	17.3	25	26.9	10.6	112	189	2035	3.55	16.1	23.1
39.6	25.9	17	16.3	12.6	17.6	34.6	820	4.61	15.5	27.9
69.8	51.9	13.3	86.6	20.5	15	17.3	583	8.43	13	21.3
133	79.9	22.5	16.4	6.32	78.4	109	375	11	24.4	19.5
26.4	24.1	18.6	14.7	5.05	9.06	18.9	1104	8.74	17.5	12.5
44.5	23.1	23.9	21.1	1	12.7	21.7	679	13.5	21.5	30.5
31.3	17.2	17.5	16.1	11.8	39.6	61.5	1055	8.82	16.4	20.2
109	108	22.5	20.7	2.5	22.1	94.7	583	81.3	204	257
70.4	40.7	22.9	22.3	3.05	16.7	28.1	542	10.5	19.5	21.5
34.6	19.5	106	478	68.5	23.1	24.6	429	10.7	20.9	28.9
43.3	31.6	42.2	69.2	23.3	22.3	34.6	667	4.33	5.83	3.92
106	63.8	20.5	24.4	14.6	17.5	31.3	528	20.4	56.2	51.4
34.3	17.9	7.77	137	24.1	24.4	44.9	1700	71.7	207	193
23.5	32.5	24.4	55.7	13.3	11.3	26.4	851	9.22	23.3	33.7
42.9	29.4	1	129	13.3	157	453	6378	9.73	33.1	56.7
65.5	28.1	19.8	163	20	21.9	38.5	474	5.28	21.1	21.1
34.3	25.3	17.6	90.6	15	7.5	8.9	184	19.6	68.5	34.3
40.7	17.9	106	562	78.4	2.86	12.9	433	7.57	25.5	17
103	75	40.3	49.6	18.6	6.15	7.64	211	10.8	16.4	25.9
158	114	27.1	27.9	10.6	106	244	4294	21.3	43.7	11
34.3	20.4	57.8	626	71.7	49.1	74.3	1252	10	25	20.4
37.9	16.8	15.5	13.9	5.38	34.9	50	1472	10.1	25.9	27.4
37.9	22.9	6.79	15.4	11.2	41.4	65.5	449	4.22	23.3	41.8
28.1	16.7	27.9	372	30.8	44.9	97.3	1731	4.14	10.8	3.82
28.6	5.57	31.6	32.8	13.1	17.2	24.8	519	9.65	24.4	20.2
173	104	21.3	155	20	14.9	44.5	1512	12.6	33.1	45.7
67.9	62.1	4.78	11.4	1.75	11.4	31.3	466	13.2	33.4	25.5
106	55.7	16.7	14.1	8.43	13.7	40.7	437	14.7	28.4	42.6
21.9	16.1	59.4	207	37.9	6.21	14.1	730	9.39	26.2	30.5
40.7	15.1	23.9	17.8	6.26	11.3	21.3	557	11.8	20.5	26.7
164	91.4	13.1	20	6.98	13.6	31.3	723	27.1	50.9	79.9
23.9	19.5	20.9	16.5	5.57	10.2	21.3	334	29.7	53.8	102
28.6	24.4	20.9	39.2	11.7	4.66	15.7	704	9.47	23.9	41.4
89.8	52.8	13.1	150	2.41	13.3	31.3	764	9.31	20.2	15.5
57.3	53.8	18.3	24.4	4.41	7.64	16	991	9.65	24.1	41.8
52.8	44.5	16.7	43.7	5	69.2	97.3	1407	9.31	16.5	34.3
32.8	27.4	22.3	25.7	7.5	29.4	83.5	2642	9.82	18.9	31.9
168	103	7.3	130	10.2	6.26	25.5	196	14.5	19.8	31.6
106	65.5	24.4	30.2	12.3	34.6	65.5	1144	2.41	12.1	17.6
52.3	26.2	22.1	172	19.6	18.9	35.5	470	8.66	16	27.4
64.4	15.3	18.1	20	6.38	10.5	28.4	644	10.3	26.7	17
66.1	31.6	18.8	28.9	9.65	13.3	27.1	449	8.66	18.1	25.3
53.8	40	13.1	195	12.6	34.6	63.2	1165	11.9	18.1	17.8
16.7	13.1	6.73	11.5	8.2	4.91	14.7	667	8.28	19.3	27.6
25.3	17.6	27.6	28.4	7.84	17.5	42.2	382	11.2	19.6	18.6
33.4	27.1	22.9	19.3	2.04	12.5	26.9	594	17.3	38.5	46.1
79.9	53.8	63.2	403	53.8	8.98	15.3	1027	26.4	57.3	92.2
44.1	30.8	23.5	22.5	1.1	101	164	1459	11.8	25.7	32.2
50.9	78.4	78.4	279	47	20.9	27.9	470	10.9	20.2	7.1
126	83.5	21.3	24.1	10.6	75	165	3619	14.5	38.5	7.3
117	66.1	4.74	16.3	15.5	22.3	37.5	328	8.74	23.1	19.8
